# Supplementary material for: A copper(ii) bromide/NMO system for α-amination of esters under continuous-flow conditions with reduced catalyst loading
Source: Royal Society of Chemistry journal article supplement (doi:10.1039/d3nj05456j), 2024-01-01
Supplement: d3nj05456j1.pdf [file d3nj05456j1.pdf]

## Copper (II) bromide/NMO system for $\alpha$ -amination of esters under continuous-flow conditions with reduced catalyst loading

Yaman Chauhan, Kankanala Naveen Kumar, V. Ravichandiran, Sonali Bindita Jethy, Nirmala Mohanta and Sharada Prasanna Swain\*

Department of Medicinal Chemistry, National Institute of Pharmaceutical Education and Research-Kolkata, 168, Maniktala Main Road, Kolkata 700054, India. [spswain2013@gmail.com](mailto:spswain2013@gmail.com); [spswain@niperkolkata.edu.in](mailto:spswain@niperkolkata.edu.in)

**General Experimental Information.** Unless otherwise mentioned, all the solvents, reactants and reagents were purchased from commercial suppliers and used without further purification. DMSO, ethyl acetate, n-hexane and toluene were procured from Sigma/Merck, India. TLC plates were visualized by exposure to ultra violet light (UV) or staining with iodine vapor.  $^1\text{H}$  NMR and  $^{13}\text{C}$  NMR spectra were obtained by using a JEOL 400 MHz NMR spectrometer. Chemical shifts for protons are reported in parts per million ( $\delta$  scale) and are referenced to residual protium in the NMR solvents [ $\text{CDCl}_3$ :  $\delta$  7.26]. Chemical shifts for carbon resonances are reported in parts per million ( $\delta$  scale) and are referenced to the carbon resonances of the solvent ( $\text{CDCl}_3$ :  $\delta$  77.0). Data are represented as follows: chemical shift, multiplicity (s = singlet, d = doublet, t = triplet, q = quartet, m = multiplet, br = broad), integration, and coupling constant in Hertz (Hz).

**Standard Procedure for  $\alpha$ -amination of esters (10) under continuous-flow conditions.** Ester compounds **1** (1.0 mmol, 1.0 eq.), amine compounds **9** (1.5 mmol, 1.5 eq.),  $\text{CuBr}_2$  (0.05 mmol, 0.05 eq.), DMSO (3.0mL) and NMO (1.0 mmol, 1.0 eq.) were stirred at rt to make homogeneous solution. Then it was pumped from a single pump, and reaction was carried out in a 10mL reactor at 100 °C with residence time of 25min. The reaction mass was allowed to cool to rt, water (3.0mL) was added, filtered. The aqueous layer was extracted with ethyl acetate (3.0mL $\times$ 3), and evaporated under vacuum. The crude mass was purified by silica gel column chromatography, the desired compounds **10** were eluted with 2-5% ethyl acetate in n-hexane.

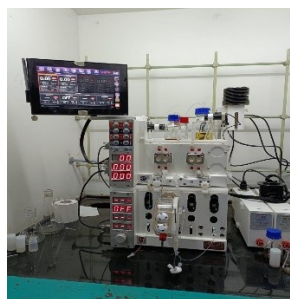

**Figure 1.** Flow reactor: VAPOURTEC R series, Instrument serial no. P1720, Software: VI.222, pump: VAPOURTEC R2C.

Reactor volume: 10 mL FEP coil (1.3 mm ID and 1.6 mm OD), Flow rate: 400 $\mu$ L/min. residence time: 25min.

*Ethyl-2-phenyl-2-(piperidin-1-yl)acetate (10a)*.<sup>1</sup> The compound **10a** was prepared by following general procedure. Physical appearance: yellow oil, Yield: 83%. Purified by column chromatography on silica gel (*n*-hexane/EA = 98/2). <sup>1</sup>H NMR (400 MHz, CDCl<sub>3</sub>)  $\delta$  7.43-7.41 (2H, m), 7.32-7.26 (3H, m), 4.18-4.06 (2H, m), 3.93 (1H, s), 2.37 (4H, J = 5.16 Hz, t), 1.60-1.54 (4H, m), 1.42-1.39 (2H, m), 1.17 (3H, J = 7.14 Hz, t). <sup>13</sup>C {1H} NMR (100 MHz, CDCl<sub>3</sub>)  $\delta$  171.9, 136.5, 129.3, 128.6, 128.5, 75.1, 60.9, 52.5, 25.8, 24.4, 14.2.

*Ethyl-2-(4-methylpiperidin-1-yl)-2-phenylacetate (10b)*. The compound **10b** was prepared by following general procedure. Physical appearance: yellow oil, Yield: 73%. Purified by column chromatography on silica gel (*n*-hexane/EA = 98/2). <sup>1</sup>H NMR (400 MHz, CDCl<sub>3</sub>)  $\delta$  7.43-7.40 (2H, m), 7.32-7.26 (3H, m), 4.20-4.06 (2H, m), 3.93 (1H, s), 2.92 (1H, J = 10.74, 2.10 Hz, dd), 2.70-2.65 (1H, m), 2.09 (1H, J = 11.19, 2.55 Hz, td), 1.85-1.79 (1H, m), 1.60-1.49 (2H, m), 1.36-1.31 (1H, m), 1.26-1.22 (2H, m), 1.19-1.15 (3H, m), 0.88 (3H, J = 5.73 Hz, d). <sup>13</sup>C {1H} NMR (100 MHz, CDCl<sub>3</sub>)  $\delta$  172.0, 136.5, 128.9, 128.5, 128.2, 74.9, 60.8, 52.3, 51.6, 34.1, 30.8, 21.9, 14.2, 14.1. HRMS (QTOF) *m/z*: calcd for C<sub>16</sub>H<sub>24</sub>NO<sub>2</sub> [M + H]<sup>+</sup>: 262.1807, found: 262.1821. IR: 3051, 2958, 1735, 1262, 1145 cm<sup>-1</sup>.

*Ethyl-1-(2-ethoxy-2-oxo-1-phenylethyl)piperidine-4-carboxylate (10c)*. The compound **10c** was prepared by following general procedure. Physical appearance: yellow oil, Yield: 63%. Purified by column chromatography on silica gel (*n*-hexane/EA = 98/2). <sup>1</sup>H NMR (400 MHz, CDCl<sub>3</sub>)  $\delta$  7.39-7.36 (2H, m), 7.30-7.22 (3H, m), 4.15-4.04 (4H, m), 3.97 (1H, s), 2.86-2.70 (2H, m), 2.26-2.14 (2H, m), 2.00-1.94 (1H, m), 1.84-1.71 (4H, m), 1.21-1.13 (6H, m). <sup>13</sup>C {1H} NMR (100 MHz, CDCl<sub>3</sub>)  $\delta$  175.1, 171.6, 136.2, 128.8, 128.5, 128.3, 74.2, 60.8, 60.3, 50.7, 41.2, 28.2, 28.2, 14.3, 14.2. HRMS (QTOF) *m/z*: calcd for C<sub>16</sub>H<sub>24</sub>NO<sub>2</sub> [M + H]<sup>+</sup>: 262.1807, found: 262.1821. IR: 3050, 2951, 1733, 1260, 1141 cm<sup>-1</sup>.

*Ethyl-2-morpholino-2-phenylacetate (10d)*.<sup>1</sup> The compound **10d** was prepared by following general procedure. Physical appearance: yellow oil, Yield: 83%. Purified by column chromatography on silica gel (*n*-hexane/EA = 95/5). <sup>1</sup>H NMR (400 MHz, CDCl<sub>3</sub>)  $\delta$  7.39 (2H, J = 7.26 Hz, d), 7.29-7.23 (3H, m), 4.14-4.02 (2H, m), 3.90 (1H, s), 3.66-3.64 (4H, m), 2.40 (4H, J = 4.28 Hz, d), 1.14-1.11 (3H, m). <sup>13</sup>C {1H} NMR (100 MHz, CDCl<sub>3</sub>)  $\delta$  171.2, 135.5, 128.9, 128.7, 128.5, 74.5, 66.8, 61.0, 51.6, 14.1.

*Ethyl-2-(6,7-dihydrothienof[3,2-*c*]pyridin-5(4H)-yl)-2-phenylacetate (10e)*. The compound **10e** was prepared by following general procedure. Physical appearance: yellow oil, Yield: 81%. Purified by column chromatography on silica gel (*n*-hexane/EA = 97/3). <sup>1</sup>H NMR (400 MHz, CDCl<sub>3</sub>)  $\delta$  7.50-7.47 (2H, m), 7.37-7.32 (3H, m), 7.04 (1H, J = 5.12 Hz, d), 6.64 (1H, J = 5.12 Hz, d), 4.27 (1H, s), 4.24-4.13 (2H, m), 3.61 (2H, J = 1.87 Hz, t), 2.87-2.80 (4H, m), 1.21 (3H, J = 7.11

Hz, t).  $^{13}\text{C}$  { $^1\text{H}$ } NMR (100 MHz,  $\text{CDCl}_3$ )  $\delta$  171.7, 136.2, 133.4, 128.9, 128.7, 128.5, 125.4, 122.8, 73.0, 61.1, 51.0, 48.4, 25.4, 14.2. HRMS (QTOF)  $m/z$ : calcd for  $\text{C}_{17}\text{H}_{20}\text{NO}_2\text{S}$  [ $\text{M} + \text{H}$ ] $^+$ : 302.1215, found: 302.1221. IR: 3056, 2955, 1733, 1540, 1260, 1141, 978, 689  $\text{cm}^{-1}$ .

*Ethyl-2-(3,4-dihydroisoquinolin-2(1H)-yl)-2-phenylacetate (10f)*.<sup>1</sup> The compound **10f** was prepared by following general procedure. Physical appearance: orange color oil, Yield: 61%. Purified by column chromatography on silica gel (*n*-hexane/EA = 98/2).  $^1\text{H}$  NMR (400 MHz,  $\text{CDCl}_3$ )  $\delta$  7.54-7.51 (2H, m), 7.39-7.28 (3H, m), 7.13-7.07 (3H, m), 6.95-6.93 (1H, m), 4.25 (1H,  $J = 1.99$  Hz, d), 4.23-4.13 (2H, m), 3.72 (2H,  $J = 4.28$  Hz, d), 2.91-2.75 (4H, m), 1.26-1.22 (3H, m).  $^{13}\text{C}$  { $^1\text{H}$ } NMR (100 MHz,  $\text{CDCl}_3$ )  $\delta$  171.7, 136.2, 134.4, 129.3, 128.9, 128.8, 128.7, 128.5, 126.8, 126.3, 125.7, 73.6, 61.0, 53.9, 48.4, 29.0, 14.3.

*Ethyl-2-phenyl-2-(pyrrolidin-1-yl)acetate (10g)*.<sup>2</sup> The compound **10g** was prepared by following general procedure. Physical appearance: yellow oil, Yield: 60%. Purified by column chromatography on silica gel (*n*-hexane/EA = 98/2).  $^1\text{H}$  NMR (400 MHz,  $\text{CDCl}_3$ )  $\delta$  7.47-7.44 (2H, m), 7.33-7.27 (3H, m), 4.13 (2H,  $J = 27.93, 10.81, 7.11$  Hz, ddd), 3.88 (1H, s), 2.57-2.54 (2H, m), 2.43-2.41 (2H, m), 1.80-1.77 (4H, m), 1.17 (3H,  $J = 7.11$  Hz, t).  $^{13}\text{C}$  { $^1\text{H}$ } NMR (100 MHz,  $\text{CDCl}_3$ )  $\delta$  171.8, 137.5, 128.6, 128.5, 128.3, 74.1, 61.0, 52.6, 23.4, 14.2.

*Methyl-2-(4-methoxyphenyl)-2-(piperidin-1-yl)acetate (10h)*. The compound **10h** was prepared by following general procedure. Physical appearance: orange color oil, Yield: 59%. Purified by column chromatography on silica gel (*n*-hexane/EA = 98/2).  $^1\text{H}$  NMR (400 MHz,  $\text{CDCl}_3$ )  $\delta$  7.33 (2H,  $J = 6.65, 2.06$  Hz, dd), 6.84 (2H,  $J = 6.65, 2.14$  Hz, dd), 3.89 (1H, s), 3.77 (3H, s), 3.65 (3H, s), 2.35 (4H,  $J = 5.35$  Hz, t), 1.58-1.54 (4H, m), 1.41 (2H,  $J = 5.35$  Hz, d).  $^{13}\text{C}$  { $^1\text{H}$ } NMR (100 MHz,  $\text{CDCl}_3$ )  $\delta$  172.7, 159.6, 130.1, 128.2, 113.9, 74.5, 55.3, 52.5, 52.0, 29.8, 29.5, 25.8, 24.4. HRMS (QTOF)  $m/z$ : calcd for  $\text{C}_{15}\text{H}_{22}\text{NO}_3$  [ $\text{M} + \text{H}$ ] $^+$ : 264.1600, found: 264.1608. IR: 3050, 2948, 1746, 1250, 1164, 1021  $\text{cm}^{-1}$ .

*Methyl-2-(6,7-dihydrothieno[3,2-*c*] pyridin-5(4H)-yl)-2-(4-methoxyphenyl) acetate (10i)*. The compound **10i** was prepared by following general procedure. Physical appearance: yellow oil, Yield: 60%. Purified by column chromatography on silica gel (*n*-hexane/EA = 98/2).  $^1\text{H}$  NMR (400 MHz,  $\text{CDCl}_3$ )  $\delta$  7.39 (2H,  $J = 6.65, 1.99$  Hz, dd), 7.04 (1H,  $J = 5.12$  Hz, d), 6.88 (2H,  $J = 6.72, 2.14$  Hz, dd), 6.64 (1H,  $J = 5.20$  Hz, d), 4.22 (1H, s), 3.80 (3H, s), 3.70 (3H, s), 3.59 (2H,  $J = 6.34$  Hz, d), 2.86-2.76 (4H, m).  $^{13}\text{C}$  { $^1\text{H}$ } NMR (100 MHz,  $\text{CDCl}_3$ )  $\delta$  172.4, 159.8, 133.4, 133.3, 130.1, 128.0, 125.4, 122.8, 114.2, 72.3, 55.4, 52.2, 51.0, 48.4, 25.3. HRMS (QTOF)  $m/z$ : calcd for  $\text{C}_{17}\text{H}_{20}\text{NO}_3\text{S}$  [ $\text{M} + \text{H}$ ] $^+$ : 318.1164, found: 318.1174. IR: 3048, 2945, 1746, 1227, 1161, 1052  $\text{cm}^{-1}$ .

*Methyl-2-(3,4-dihydroisoquinolin-2(1H)-yl)-2-(4-methoxyphenyl)acetate (10j)*. The compound **10j** was prepared by following general procedure. Physical appearance: yellow oil, Yield: 60%. Purified by column chromatography on silica gel (*n*-hexane/EA = 98/2).  $^1\text{H}$  NMR (400 MHz,  $\text{CDCl}_3$ )  $\delta$  7.42 (2H,  $J = 6.72, 2.14$  Hz, dd), 7.11-7.05 (3H, m), 6.94-6.88 (3H, m), 4.16 (1H, s),

3.80 (3H, s), 3.71 (3H, s), 3.66 (2H, J = 5.50 Hz, d), 2.89-2.68 (4H, m).  $^{13}\text{C}$  {1H} NMR (100 MHz,  $\text{CDCl}_3$ )  $\delta$  172.4, 159.8, 134.3, 130.5, 128.7, 127.8, 126.8, 126.6, 126.3, 125.7, 114.1, 72.9, 55.3, 53.9, 52.2, 48.4, 28.9. HRMS (QTOF)  $m/z$ : calcd for  $\text{C}_{20}\text{H}_{24}\text{NO}_3$  [M + H] $^+$ : 326.1756, found: 326.1776. IR: 3050, 2952, 1743, 1213, 1094, 1032  $\text{cm}^{-1}$ .

*Methyl 2-(4-methoxyphenyl)-2-morpholinoacetate (10k)*. The compound **10k** was prepared by following general procedure. Physical appearance: yellow oil, Yield: 62%. Purified by column chromatography on silica gel (*n*-hexane/EA = 95/5).  $^1\text{H}$  NMR (400 MHz,  $\text{CDCl}_3$ )  $\delta$  7.35-7.31 (2H, m), 6.87-6.83 (2H, m), 3.88 (1H, s), 3.77 (3H, J = 2.22 Hz, d), 3.72-3.68 (4H, m), 3.65 (3H, s), 2.42-2.39 (4H, m).  $^{13}\text{C}$  {1H} NMR (100 MHz,  $\text{CDCl}_3$ )  $\delta$  172.0, 159.9, 130.1, 127.3, 114.1, 73.9, 66.8, 55.4, 52.1, 51.7. HRMS (QTOF)  $m/z$ : calcd for  $\text{C}_{14}\text{H}_{20}\text{NO}_4$  [M + H] $^+$ : 266.1392, found: 266.1400. IR: 3051, 2945, 1744, 1227, 1116, 1031  $\text{cm}^{-1}$ .

*Ethyl-2-(piperidin-1-yl)-2-(4-(trifluoromethyl)phenyl)acetate (10l)*. The compound **10l** was prepared by following general procedure. Physical appearance: yellow oil, Yield: 52%. Purified by column chromatography on silica gel (*n*-hexane/EA = 98/2).  $^1\text{H}$  NMR (400 MHz,  $\text{CDCl}_3$ )  $\delta$  7.59-7.55 (4H, m), 4.22-4.07 (2H, m), 4.01 (1H, s), 2.37 (4H, J = 5.04 Hz, t), 1.61-1.57 (4H, m), 1.44 (2H, J = 11.42, 5.92 Hz, dd), 1.20 (3H, J = 7.11 Hz, t).  $^{13}\text{C}$  {1H} NMR (100 MHz,  $\text{CDCl}_3$ )  $\delta$  171.2, 140.7, 130.5, 129.2, 125.5, 125.4, 122.8, 74.6, 61.1, 52.4, 25.9, 24.3, 14.2. HRMS (QTOF)  $m/z$ : calcd for  $\text{C}_{16}\text{H}_{21}\text{F}_3\text{NO}_2$  [M + H] $^+$ : 316.1524, found: 316.1546. IR: 3050, 2952, 1746, 1230, 1051, 1172  $\text{cm}^{-1}$ .

*Ethyl-2-(4-bromophenyl)-2-(piperidin-1-yl) acetate (10m)*. The compound **10m** was prepared by following general procedure. Physical appearance: yellow oil, Yield: 68%. Purified by column chromatography on silica gel (*n*-hexane/EA = 98/2).  $^1\text{H}$  NMR (400 MHz,  $\text{CDCl}_3$ )  $\delta$  7.44-7.41 (2H, m), 7.32-7.27 (2H, m), 4.19-4.04 (2H, m), 3.88 (1H, s), 2.34 (4H, J = 4.97 Hz, t), 1.58-1.52 (4H, m), 1.43-1.37 (2H, m), 1.17 (3H, J = 7.13, 1.40 Hz, td).  $^{13}\text{C}$  {1H} NMR (100 MHz,  $\text{CDCl}_3$ )  $\delta$  172.5, 135.7, 131.9, 130.5, 121.8, 74.4, 61.0, 52.4, 25.8, 24.4, 14.1. HRMS (QTOF)  $m/z$ : calcd for  $\text{C}_{15}\text{H}_{21}\text{BrNO}_2$  [M + H] $^+$ : 326.0756, found: 326.0743. IR: 3062, 1940, 1735, 1475, 1262, 1145, 1072, 1021, 902, 685, 673  $\text{cm}^{-1}$ .

*Methyl-2-(2-chlorophenyl)-2-(piperidin-1-yl)-acetate (10n)*. The compound **10n** was prepared by following general procedure. Physical appearance: yellow oil, Yield: 69%. Purified by column chromatography on silica gel (*n*-hexane/EA = 98/2).  $^1\text{H}$  NMR (400 MHz,  $\text{CDCl}_3$ )  $\delta$  7.65 (1H, J = 7.64, 1.91 Hz, dd), 7.35-7.32 (1H, m), 7.26-7.19 (2H, m), 4.59 (1H, s), 3.66 (3H, s), 2.50-2.38 (4H, m), 1.60-1.54 (4H, m), 1.43-1.40 (2H, m).  $^{13}\text{C}$  {1H} NMR (100 MHz,  $\text{CDCl}_3$ )  $\delta$  171.6, 134.7, 134.2, 130.1, 129.6, 129.1, 127.0, 69.7, 52.3, 52.0, 26.0, 24.4. HRMS (QTOF)  $m/z$ : calcd for  $\text{C}_{14}\text{H}_{19}\text{ClNO}_2$  [M + H] $^+$ : 268.1104, found: 268.1114. IR: 3046, 2951, 1742, 1262, 1116  $\text{cm}^{-1}$ .

*Methyl 2-(2-chlorophenyl)-2-(4-methylpiperidin-1-yl) acetate (10o)*. The compound **10o** was prepared by following general procedure. Physical appearance: yellow oil, Yield: 77%. Purified by column chromatography on silica gel (*n*-hexane/EA = 97/3).  $^1\text{H}$  NMR (400 MHz,  $\text{CDCl}_3$ )  $\delta$

7.64 (1H, J = 7.68, 1.87 Hz, dd), 7.33 (1H, J = 7.79, 1.45 Hz, dd), 7.26-7.16 (2H, m), 4.59 (1H, s), 3.65 (3H, s), 2.94 (1H, J = 10.85, 2.22 Hz, dd), 2.66 (1H, J = 11.12, 2.10 Hz, dd), 2.16-2.01 (2H, m), 1.61-1.49 (2H, m), 1.36-1.29 (2H, m), 1.26-1.20 (1H, m), 0.88 (3H, J = 6.04 Hz, d). <sup>13</sup>C {1H} NMR (100 MHz, CDCl<sub>3</sub>) δ 171.6, 134.7, 134.3, 130.0, 129.6, 129.2, 127.1, 69.4, 52.1, 52.0, 51.4, 34.3, 34.2, 30.7, 21.9. HRMS (QTOF) *m/z*: calcd for C<sub>15</sub>H<sub>21</sub>ClNO<sub>2</sub> [M + H]<sup>+</sup>: 282.1261, found: 282.1266. IR: 3050, 2955, 1742, 1262, 1164, 751 cm<sup>-1</sup>.

*Methyl-2-(2-chlorophenyl)-2-morpholinoacetate (10p)*.<sup>2</sup> The compound **10p** was prepared by following general procedure. Physical appearance: colorless oil, Yield: 70%. Purified by column chromatography on silica gel (*n*-hexane/EA = 95/5). <sup>1</sup>H NMR (400 MHz, CDCl<sub>3</sub>) δ 7.60 (1H, J = 7.49, 2.06 Hz, dd), 7.35-7.33 (1H, m), 7.25-7.17 (2H, m), 4.62 (1H, s), 3.67 (4H, J = 4.70 Hz, t), 3.64 (3H, s), 2.56-2.40 (4H, m). <sup>13</sup>C {1H} NMR (100 MHz, CDCl<sub>3</sub>) δ 171.1, 134.9, 133.2, 130.1, 129.8, 129.5, 127.2, 68.9, 66.9, 52.2, 51.3.

*Methyl-2-(2-chlorophenyl)-2-(3,4-dihydroisoquinolin-2(1H)-yl)acetate (10q)*.<sup>3</sup> The compound **10q** was prepared by following general procedure. Physical appearance: yellow oil, Yield: 53%. Purified by column chromatography on silica gel (*n*-hexane/EA = 97/3). <sup>1</sup>H NMR (400 MHz, CDCl<sub>3</sub>) δ 7.73-7.71 (1H, m), 7.41-7.39 (1H, m), 7.29-7.25 (2H, m), 7.10-7.07 (3H, m), 6.96-6.94 (1H, m), 4.86 (1H, s), 3.72 (3H, s), 3.71-3.67 (2H, m), 2.89-2.81 (4H, m). <sup>13</sup>C {1H} NMR (100 MHz, CDCl<sub>3</sub>) δ 171.4, 134.8, 134.3, 134.2, 133.9, 130.1, 129.8, 129.5, 128.8, 127.3, 126.7, 126.3, 125.7, 68.5, 53.7, 52.3, 48.4, 29.2.

*Methyl-2-(2-chlorophenyl)-2-(pyrrolidin-1-yl)acetate (10r)*.<sup>2</sup> The compound **10r** was prepared by following general procedure. Physical appearance: yellow oil, Yield: 57%. Purified by column chromatography on silica gel (*n*-hexane/EA = 95/5). <sup>1</sup>H NMR (400 MHz, CDCl<sub>3</sub>) δ 7.69 (1H, J = 7.68, 1.87 Hz, dd), 7.37 (1H, J = 7.79, 1.45 Hz, dd), 7.29-7.20 (2H, m), 4.67 (1H, s), 3.69 (3H, s), 2.67-2.62 (2H, m), 2.51-2.46 (2H, m), 1.84-1.77 (4H, m). <sup>13</sup>C {1H} NMR (100 MHz, CDCl<sub>3</sub>) δ 171.7, 135.3, 134.0, 130.1, 129.7, 127.3, 125.1, 67.9, 52.3, 52.2, 23.5.

*Methyl-2-(2-fluorophenyl)-2-(piperidin-1-yl)acetate (10s)*. The compound **10s** was prepared by following general procedure. Physical appearance: yellow oil, Yield: 80%. Purified by column chromatography on silica gel (*n*-hexane/EA = 98/2). <sup>1</sup>H NMR (400 MHz, CDCl<sub>3</sub>) δ 7.52 (1H, J = 7.51, 1.76 Hz, td), 7.31-7.25 (1H, m), 7.14 (1H, J = 7.55, 1.17 Hz, td), 7.07-7.02 (1H, m), 4.47 (1H, s), 3.69 (3H, s), 2.47-2.42 (4H, m), 1.63-1.57 (4H, m), 1.44-1.38 (2H, m). <sup>13</sup>C {1H} NMR (100 MHz, CDCl<sub>3</sub>) δ 171.7, 162.4, 159.9, 130.3, 129.7, 129.6, 124.2, 124.2, 123.0, 122.9, 115.6, 115.4, 66.1, 52.1, 52.0, 29.8, 26.0, 24.3. HRMS (QTOF) *m/z*: calcd for C<sub>14</sub>H<sub>19</sub>FNO<sub>2</sub> [M + H]<sup>+</sup>: 252.1400, found: 252.1429. IR: 3052, 2951, 1748, 1221, 1162, 1090 cm<sup>-1</sup>.

*Methyl-2-(2-fluorophenyl)-2-morpholinoacetate (10t)*. The compound **10t** was prepared by following general procedure. Physical appearance: yellow oil, Yield: 74%. Purified by column chromatography on silica gel (*n*-hexane/EA = 95/5). <sup>1</sup>H NMR (400 MHz, CDCl<sub>3</sub>) δ 7.48 (1H, J = 7.45, 1.73 Hz, td), 7.30-7.25 (1H, m), 7.12 (1H, J = 7.55, 1.02 Hz, td), 7.07-7.02 (1H, m), 4.46

(1H, s), 3.69 (4H, J = 4.66 Hz, t), 3.67 (3H, J = 0.92 Hz, d), 2.49 (4H, J = 4.58 Hz, t). <sup>13</sup>C {1H} NMR (100 MHz, CDCl<sub>3</sub>) δ 171.1, 162.4, 159.9, 130.2, 124.4, 122.0, 115.8, 115.6, 66.9, 65.4, 52.2, 51.1. HRMS (QTOF) *m/z*: calcd for C<sub>13</sub>H<sub>17</sub>FNO<sub>3</sub> [M + H]<sup>+</sup>: 254.1192, found: 254.1198. IR: 3050, 2952, 1748, 1227, 1140, 1092 cm<sup>-1</sup>.

*Methyl-2-(piperidin-1-yl)-2-(p-tolyl)acetate (10u)*.<sup>4</sup> The compound **10u** was prepared by following general procedure. Physical appearance: yellow oil, Yield: 71%. Purified by column chromatography on silica gel (*n*-hexane/EA = 98/2). <sup>1</sup>H NMR (400 MHz, CDCl<sub>3</sub>) δ 7.31-7.29 (2H, m), 7.13 (2H, J = 7.6, d), 4.19 (1H, s), 3.64 (3H, s), 2.40-2.31 (4H, m), 2.20 (3H, s), 1.66-1.54 (4H, m), 1.43-1.39 (2H, m). <sup>13</sup>C {1H} NMR (100 MHz, CDCl<sub>3</sub>) δ 172.6, 138.0, 133.2, 129.3, 128.8, 74.8, 52.5, 52.0, 25.8, 24.4, 21.2. HRMS (QTOF) *m/z*: calcd for C<sub>15</sub>H<sub>22</sub>NO<sub>2</sub> [M + H]<sup>+</sup>: 248.1651, found: 248.1662.

*Methyl-2-morpholino-2-(p-tolyl)acetate (10v)*.<sup>5</sup> The compound **10v** was prepared by following general procedure. Physical appearance: yellow oil, Yield: 87%. Purified by column chromatography on silica gel (*n*-hexane/EA = 95/5). <sup>1</sup>H NMR (400 MHz, CDCl<sub>3</sub>) δ 7.28 (2H, J = 8.0, 2H), 7.108 (2H, J = 7.6, d), 3.89 (1H, s), 3.67-3.64 (4H, m), 3.61 (3H, s), 2.39-2.37 (4H, m), 2.27 (3H, s). <sup>13</sup>C {1H} NMR (100 MHz, CDCl<sub>3</sub>) δ 171.9, 138.4, 132.3, 129.4, 128.8, 74.2, 66.8, 52.0, 51.7, 21.2.

*Methyl-2-(6,7-dihydrothieno[3,2-*c*] pyridin-5(4H)-yl)-2-(p-tolyl)acetate (10w)*. The compound **10w** was prepared by following general procedure. Physical appearance: yellow oil, Yield: 72%. Purified by column chromatography on silica gel (*n*-hexane/EA = 98/2). <sup>1</sup>H NMR (400 MHz, CDCl<sub>3</sub>) δ 7.36 (2H, J = 6.42, 1.76 Hz, dd), 7.16 (2H, J = 7.87 Hz, d), 7.04 (1H, J = 5.12 Hz, d), 6.64 (1H, J = 5.12 Hz, d), 4.25 (1H, s), 3.70 (3H, s), 3.61-3.59 (2H, m), 2.89-2.75 (4H, m), 2.34 (3H, s). <sup>13</sup>C {1H} NMR (100 MHz, CDCl<sub>3</sub>) δ 172.3, 138.4, 133.4, 133.3, 133.0, 129.5, 128.8, 125.4, 122.8, 72.7, 52.2, 51.1, 48.4, 25.3, 21.3. HRMS (QTOF) *m/z*: calcd for C<sub>17</sub>H<sub>20</sub>NO<sub>2</sub>S [M + H]<sup>+</sup>: 302.1215, found: 302.1221. IR: 3055, 2948, 1745, 1223, 1151, 1053 cm<sup>-1</sup>.

*Methyl-2-(3,4-dihydroisoquinolin-2(1H)-yl)-2-(p-tolyl)acetate (10x)*. The compound **10x** was prepared by following general procedure. Physical appearance: yellow oil, Yield: 58%. Purified by column chromatography on silica gel (*n*-hexane/EA = 98/2). <sup>1</sup>H NMR (400 MHz, CDCl<sub>3</sub>) δ 7.39 (2H, J = 7.95 Hz, d), 7.18 (2H, J = 8.25 Hz, d), 7.12-7.06 (3H, m), 6.95-6.93 (1H, m), 4.20 (1H, s), 3.72 (3H, s), 3.69 (2H, J = 6.65 Hz, d), 2.90-2.70 (4H, m), 2.36 (3H, s). <sup>13</sup>C {1H} NMR (100 MHz, CDCl<sub>3</sub>) δ 172.3, 138.4, 134.4, 134.3, 133.0, 129.5, 128.8, 128.8, 126.8, 126.3, 125.7, 73.3, 54.0, 52.2, 48.4, 28.9, 21.3. HRMS (QTOF) *m/z*: calcd for C<sub>19</sub>H<sub>22</sub>NO<sub>2</sub> [M + H]<sup>+</sup>: 296.1651, found: 296.1666. IR: 3055, 2954, 1744, 1268, 1095 cm<sup>-1</sup>.

*Ethyl 2-(1H-indol-3-yl)-2-(piperidin-1-yl) acetate (10y)*. The compound **10y** was prepared by following general procedure. Physical appearance: yellow oil, Yield: 80%. Purified by column chromatography on silica gel (*n*-hexane/EA = 85/15). <sup>1</sup>H NMR (400 MHz, CDCl<sub>3</sub>) δ 9.15 (1H, s), 7.84 (1H, J = 7.87 Hz, d), 7.32-7.30 (1H, m), 7.24-7.13 (3H, m), 4.43 (1H, s), 4.18 (2H, J = 43.88,

10.83, 7.13 Hz, ddd), 2.62-2.54 (4H, m), 1.61-1.56 (4H, m), 1.45-1.39 (2H, m), 1.20 (3H, J = 7.11 Hz, t).  $^{13}\text{C}$  {1H} NMR (100 MHz,  $\text{CDCl}_3$ )  $\delta$  172.8, 136.3, 127.6, 124.8, 122.1, 119.7, 119.6, 111.7, 110.2, 66.7, 60.9, 52.5, 25.9, 24.5, 14.3. HRMS (QTOF)  $m/z$ : calcd for  $\text{C}_{17}\text{H}_{23}\text{N}_2\text{O}_2$   $[\text{M} + \text{H}]^+$ : 287.1760, found: 287.1775. IR: 3051, 2950, 2934, 1734, 1180  $\text{cm}^{-1}$ .

*Ethyl-2-(thiophen-3-yl)acetate (10z)*. The compound **10z** was prepared by following general procedure. Physical appearance: yellow oil, Yield: 59%. Purified by column chromatography on silica gel (*n*-hexane/EA = 98/2).  $^1\text{H}$  NMR (400 MHz,  $\text{CDCl}_3$ )  $\delta$  7.25 (2H, J = 6.58, 3.14 Hz, dd), 7.16-7.13 (1H, m), 4.22-4.12 (3H, m), 4.11 (1H, s), 2.43-2.37 (4H, m), 1.59-1.54 (4H, m), 1.43-1.38 (2H, m), 1.24-1.20 (3H, m).  $^{13}\text{C}$  {1H} NMR (100 MHz,  $\text{CDCl}_3$ )  $\delta$  171.5, 136.9, 128.0, 125.6, 124.1, 70.0, 60.8, 52.1, 25.9, 24.4, 14.3. HRMS (QTOF)  $m/z$ : calcd for  $\text{C}_{12}\text{H}_{18}\text{NO}_2\text{S}$   $[\text{M} + \text{H}]^+$ : 240.1058, found: 240.1061. IR: 3054, 2950, 1732, 1258, 1152  $\text{cm}^{-1}$ .

## References

- (1) W.-G. Jia, D.-D. Li, Y.-C. Dai, H. Zhang, L.-Q. Yan, E.-H. Sheng, Y. Wei, X.-L. Mu, K.-W. Huang, Synthesis and Characterization of Bisoxazolines- and Pybox-Copper Complexes and Their Application in the Coupling of  $\alpha$ -Carbonyls with Functionalized Amines, *Org. Biomol. Chem.* 12 (2014) 5509–5516, <https://doi.org/10.1039/C4OB01027B>.
- (2) Y. K. Nagare, I. A. Shah, J. Yadav, A. P. Pawar, R. Choudhary, P. Chauhan, I. Kumar, Electrochemical Oxidative Coupling Between Benzylic C( $\text{Sp}^3$ )–H and N–H of Secondary Amines: Rapid Synthesis of  $\alpha$ -Amino  $\alpha$ -Aryl Esters, *J. Org. Chem.* 86 (2021) 9682–9691, <https://doi.org/10.1021/acs.joc.1c00944>.
- (3) M. A. Farha, K. Koteva, R. T. Gale, E. W. Sewell, G. D. Wright, E. D. Brown, Designing Analogs of Ticlopidine, a Wall Teichoic Acid Inhibitor, to Avoid Formation of Its Oxidative Metabolites, *Bioorg. Med. Chem. Lett.* 24 (2014) 905–910, <https://doi.org/10.1016/j.bmcl.2013.12.069>.
- (4) Y. Zhou, R. J. Angelici, L. K. Woo, Bulk Gold-Catalyzed Reactions of Diazoalkanes with Amines and  $\text{O}_2$  to Give Enamines, *Catal. Lett.* 137 (2010) 8–15, <https://doi.org/10.1007/s10562-010-0339-7>.
- (5) K. Li, Q. Li, Q. Shi, Y. He, W. Yu, J. Chang, Iodine-Mediated  $\text{Sp}^3$  C–H Amination Reactions Forming  $\alpha$ -Amino Ketones/Esters and Fused Imidazoles, *Asian J. Org. Chem.* 11 (2022) e202200268, <https://doi.org/10.1002/ajoc.202200268>.

SPS-YC-33\_PROTON-1-2.jdf

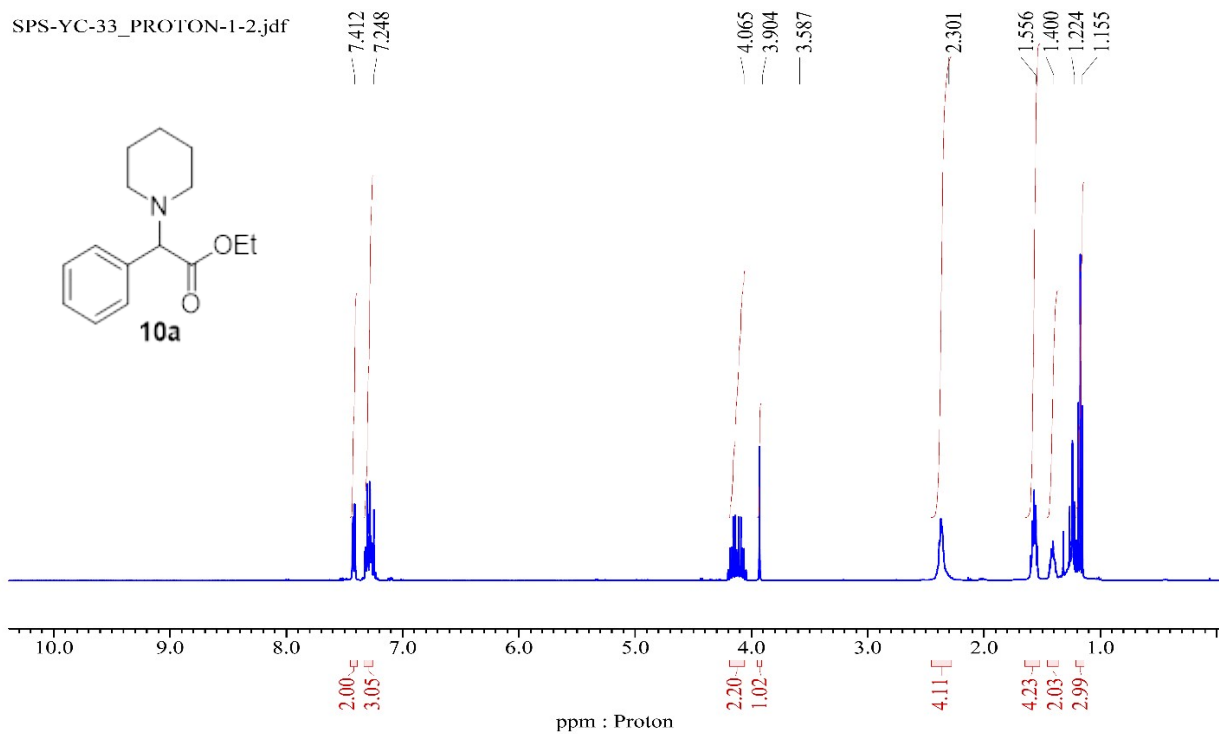

<sup>1</sup>H NMR spectrum of **10a**

SPS-YC-33\_CARBON-1-2.jdf

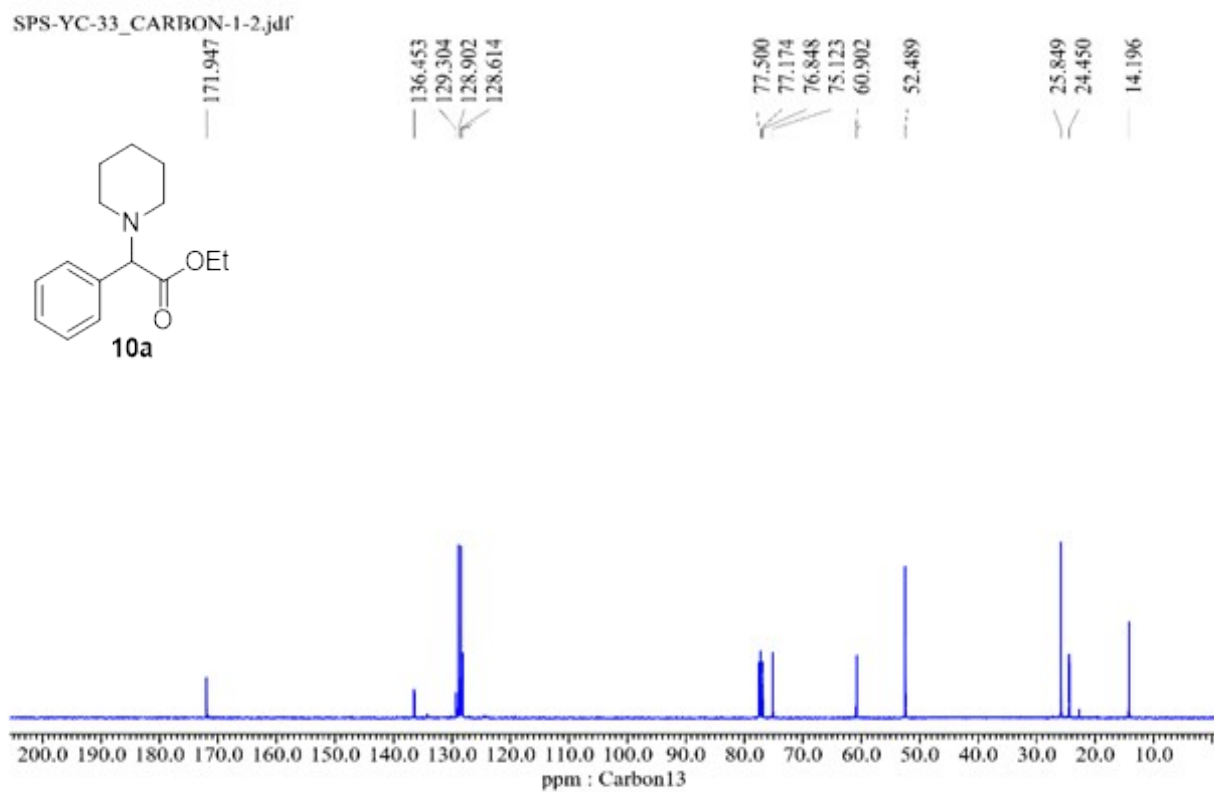

<sup>13</sup>C NMR spectrum of **10a**



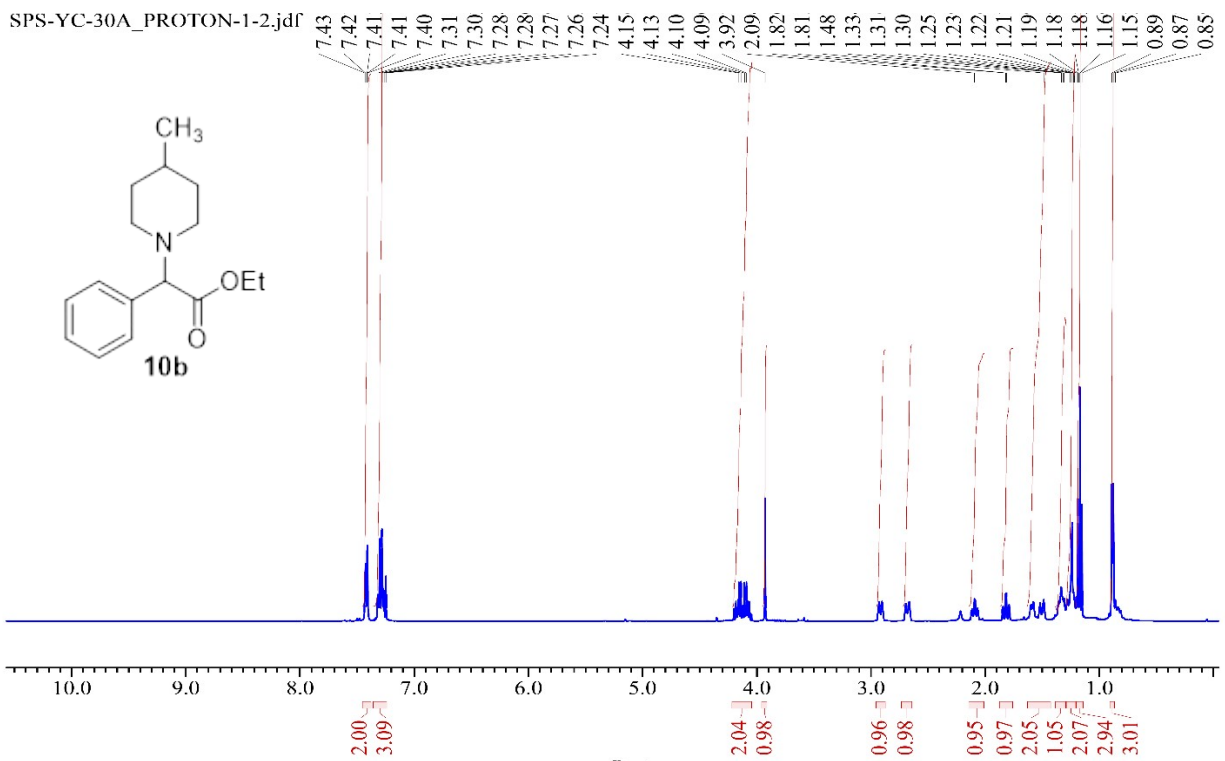

<sup>1</sup>H NMR spectrum of **10b**

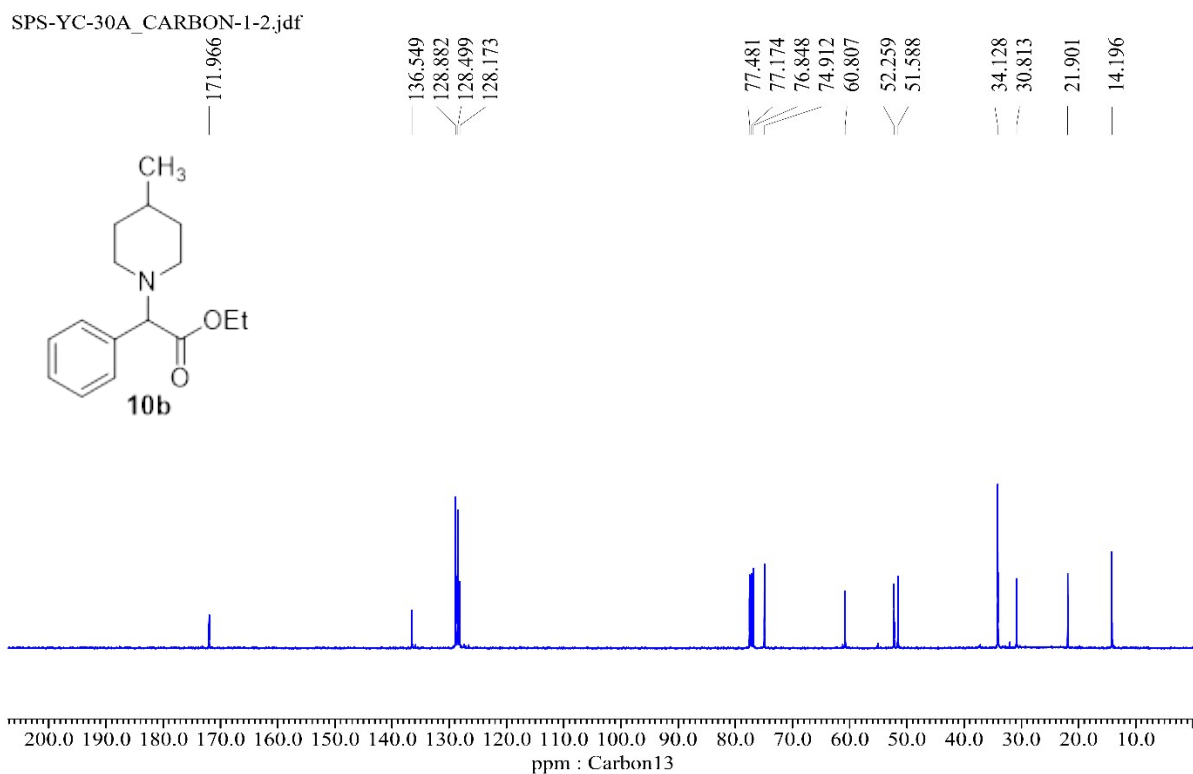

<sup>13</sup>C NMR spectrum of **10b**

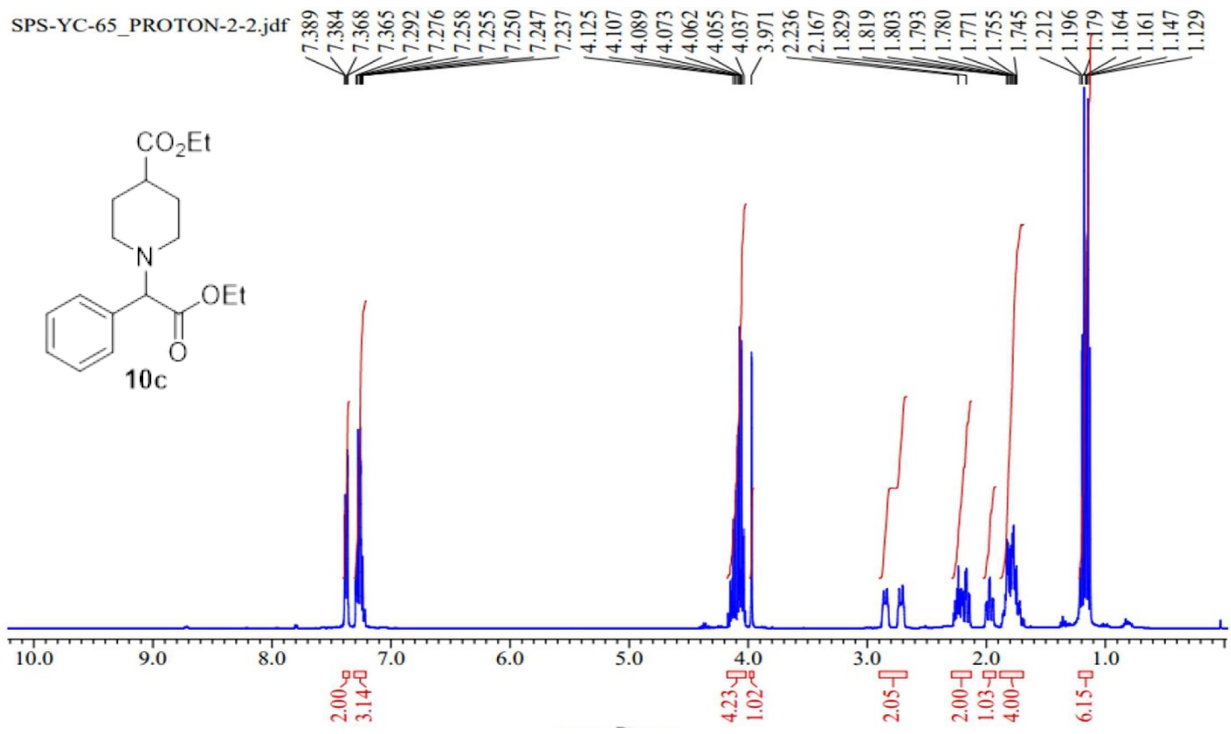

<sup>1</sup>H NMR spectrum of **10c**

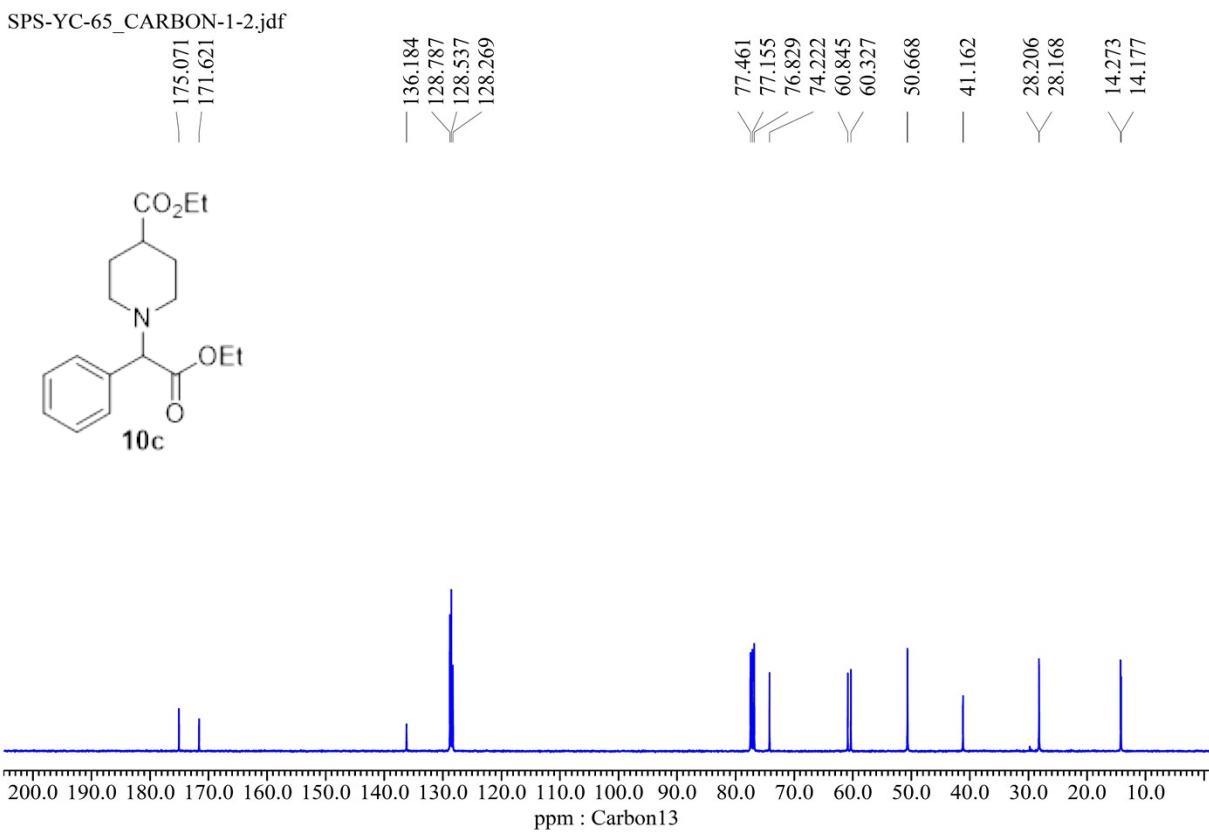

<sup>13</sup>C NMR spectrum of **10c**

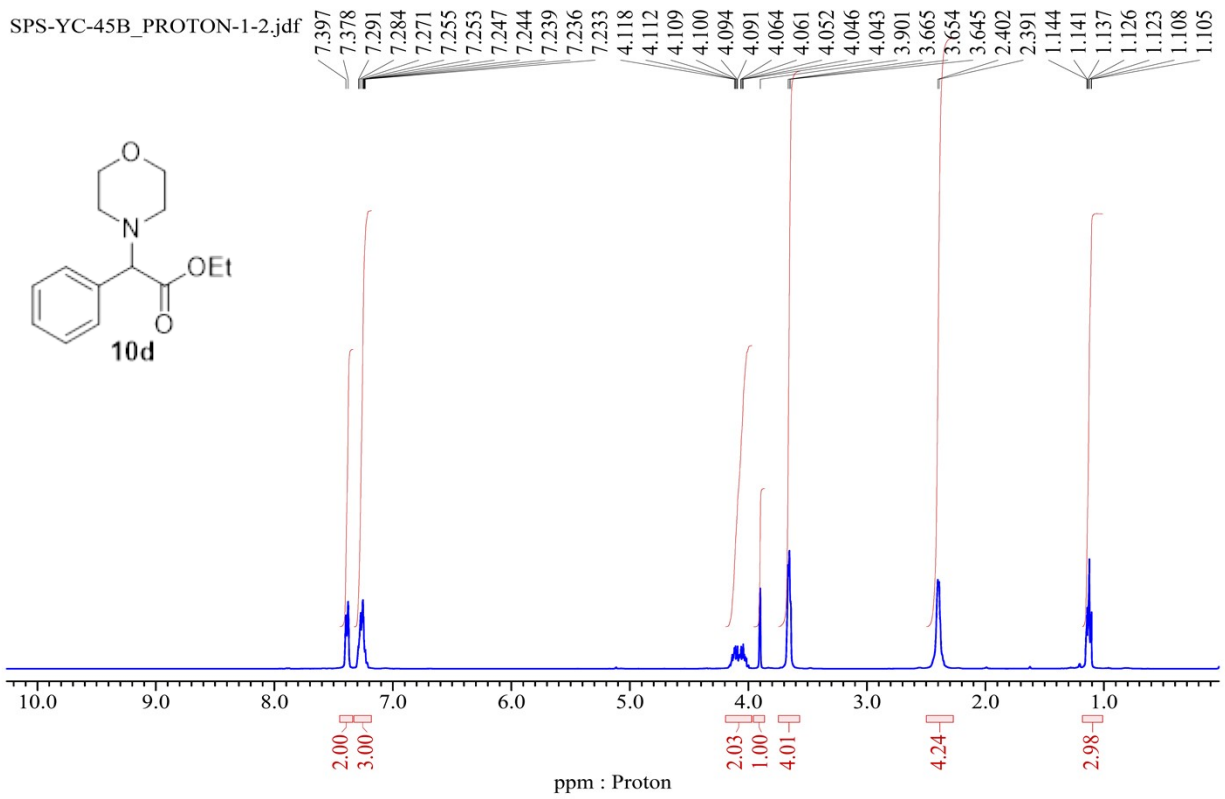

<sup>1</sup>H NMR spectrum of **10d**

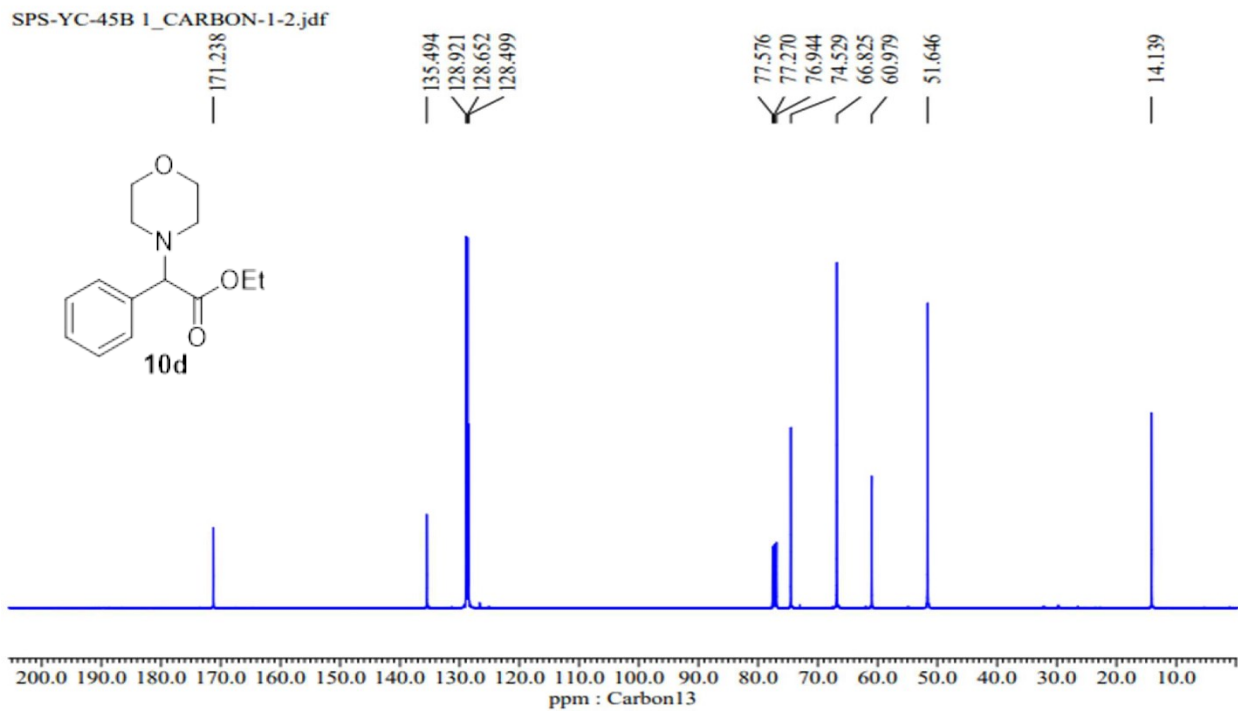

<sup>13</sup>C NMR spectrum of **10d**

SPS-YC-23\_PROTON-1-2.jdf

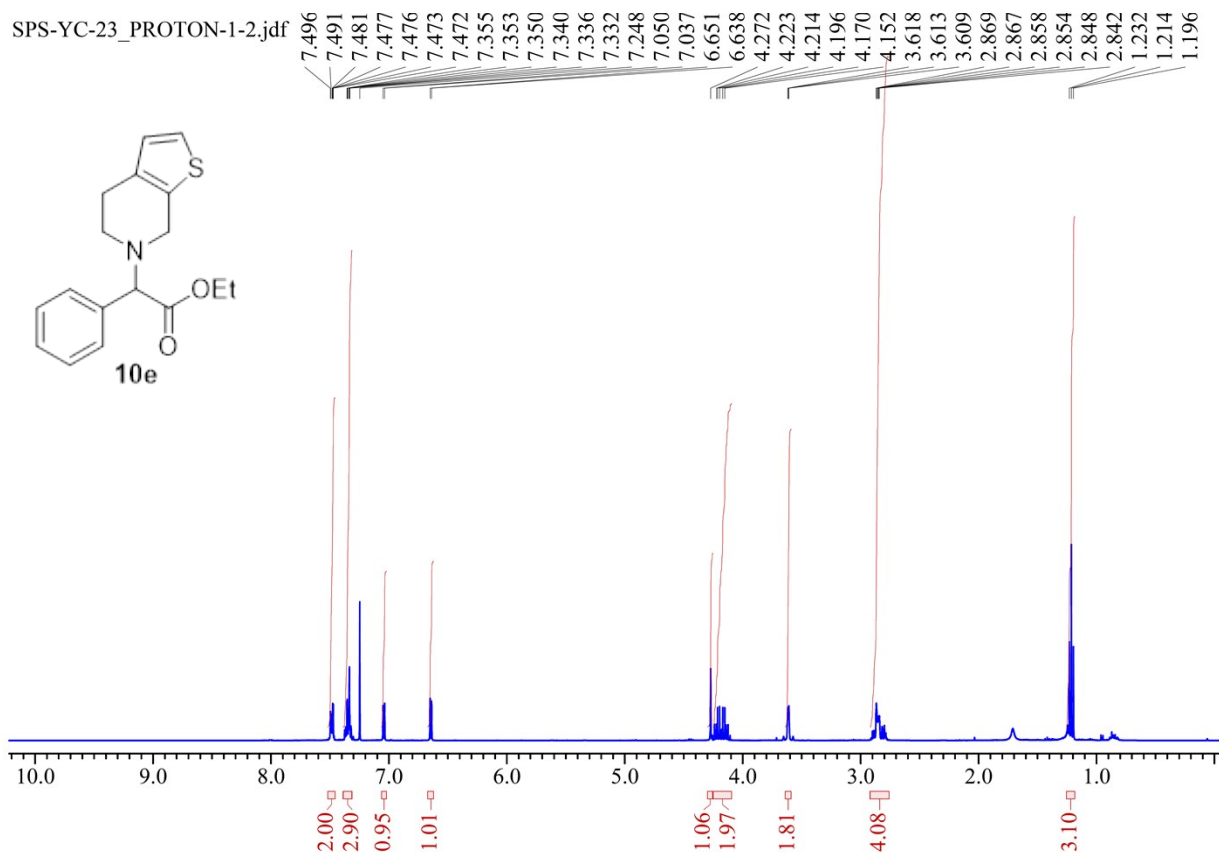

<sup>1</sup>H NMR spectrum of **10e**

SPS-YC-23\_CARBON-1-2.jdf

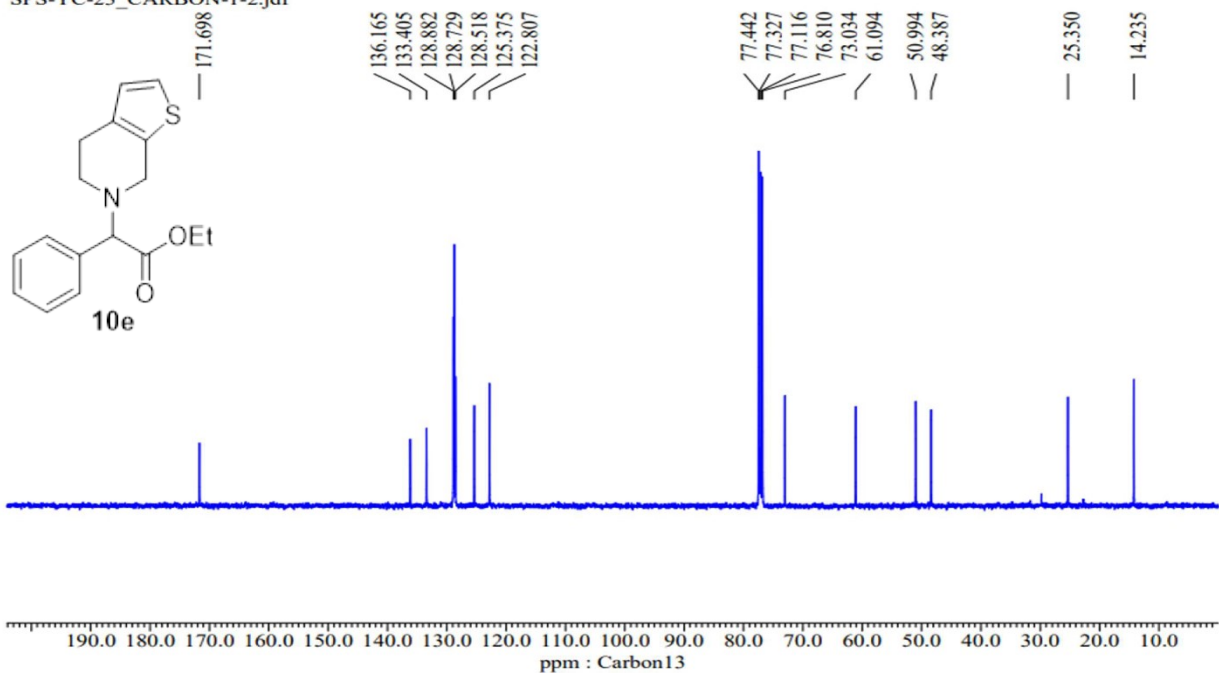

<sup>13</sup>C NMR spectrum of **10e**

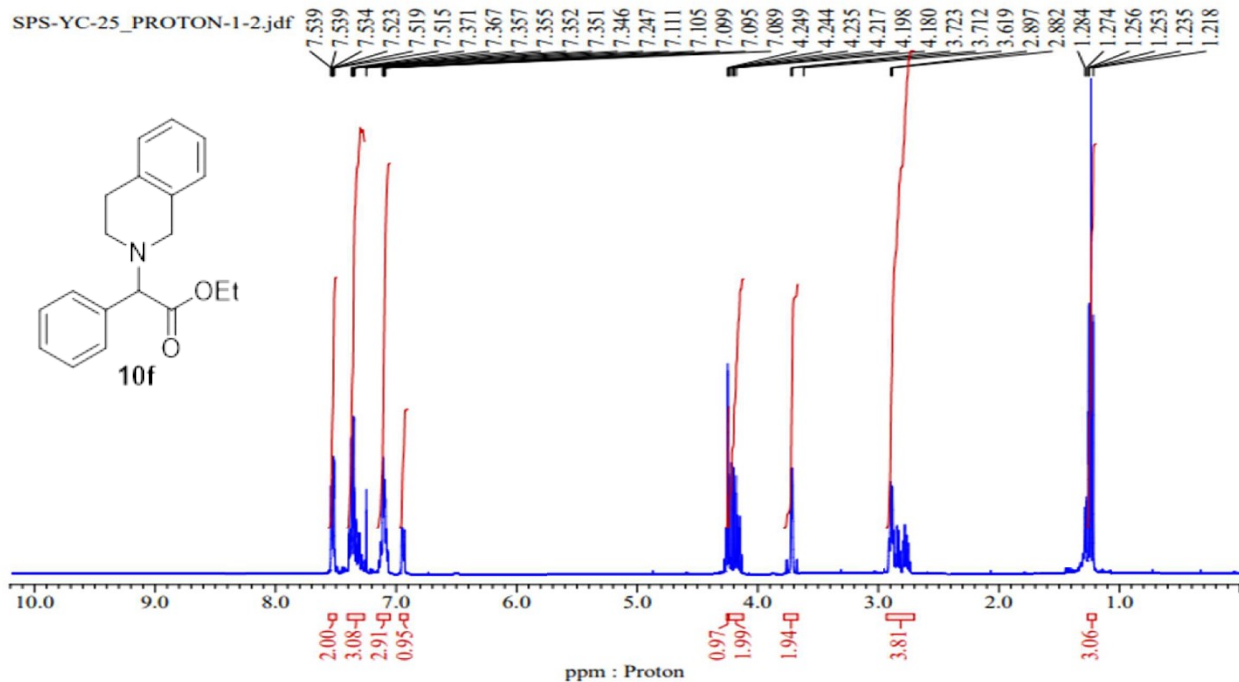

$^1\text{H}$  NMR spectrum of **10f**

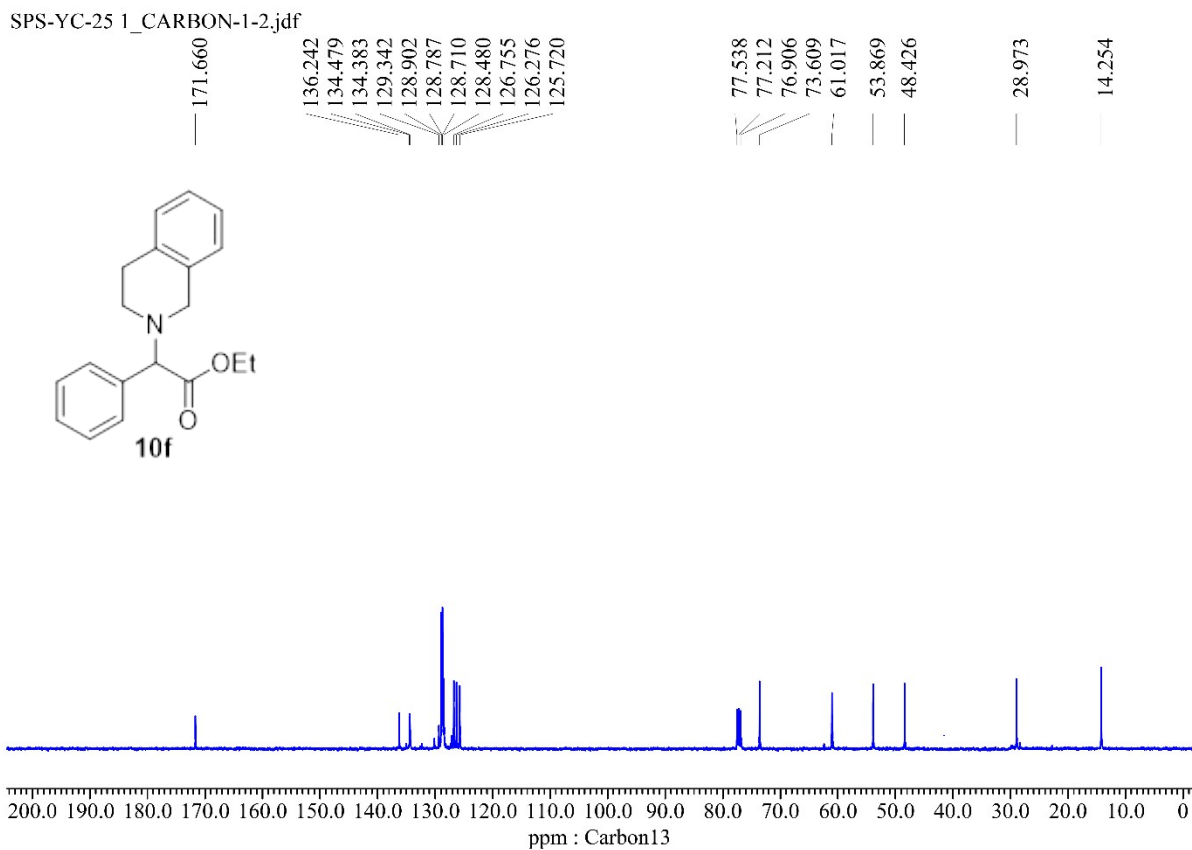

$^{13}\text{C}$  NMR spectrum of **10f**

SPS-YC-24B\_PROTON-1-2.jdf

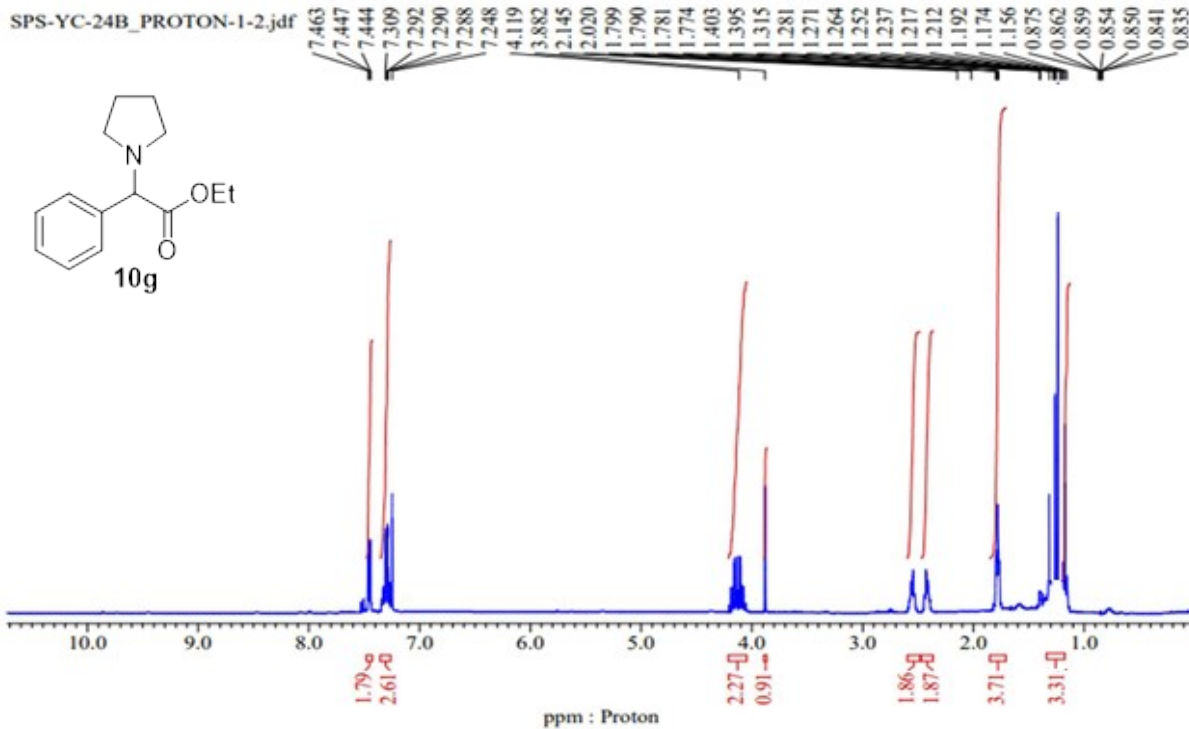

<sup>1</sup>H NMR spectrum of **10g**

SPS-YC-24B\_CARBON-1-2.jdf

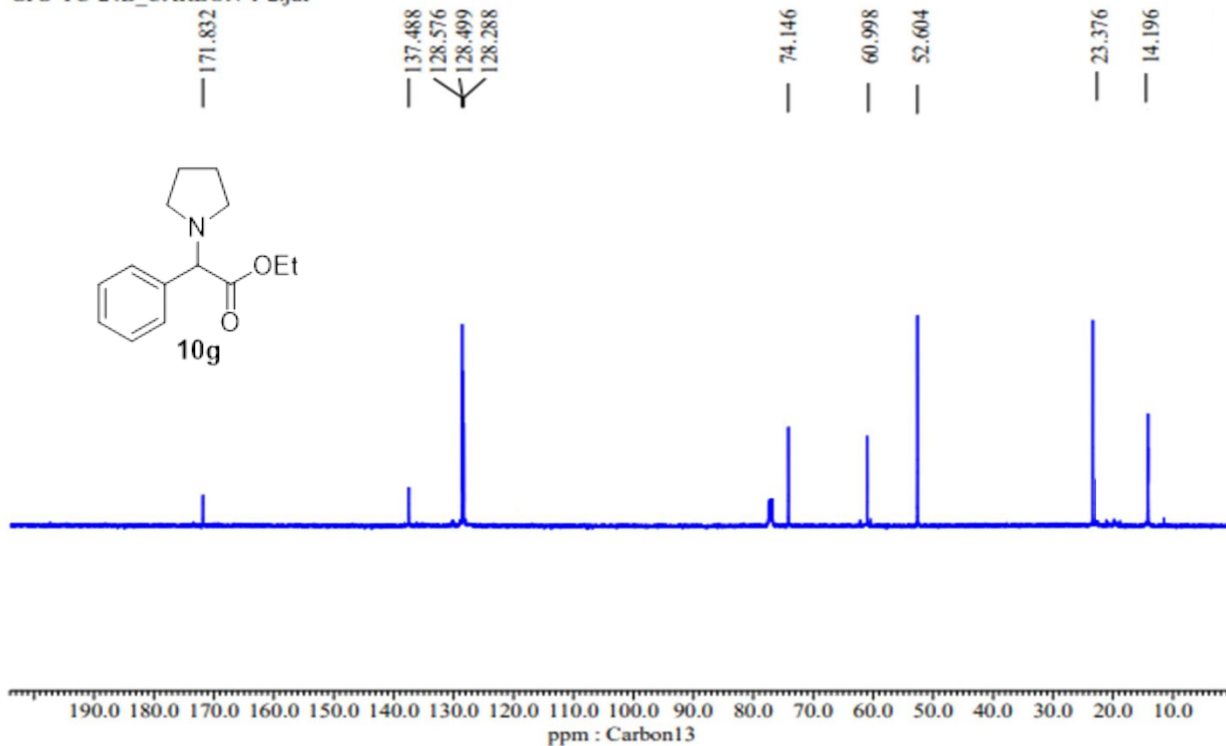

<sup>13</sup>C NMR spectrum of **10g**

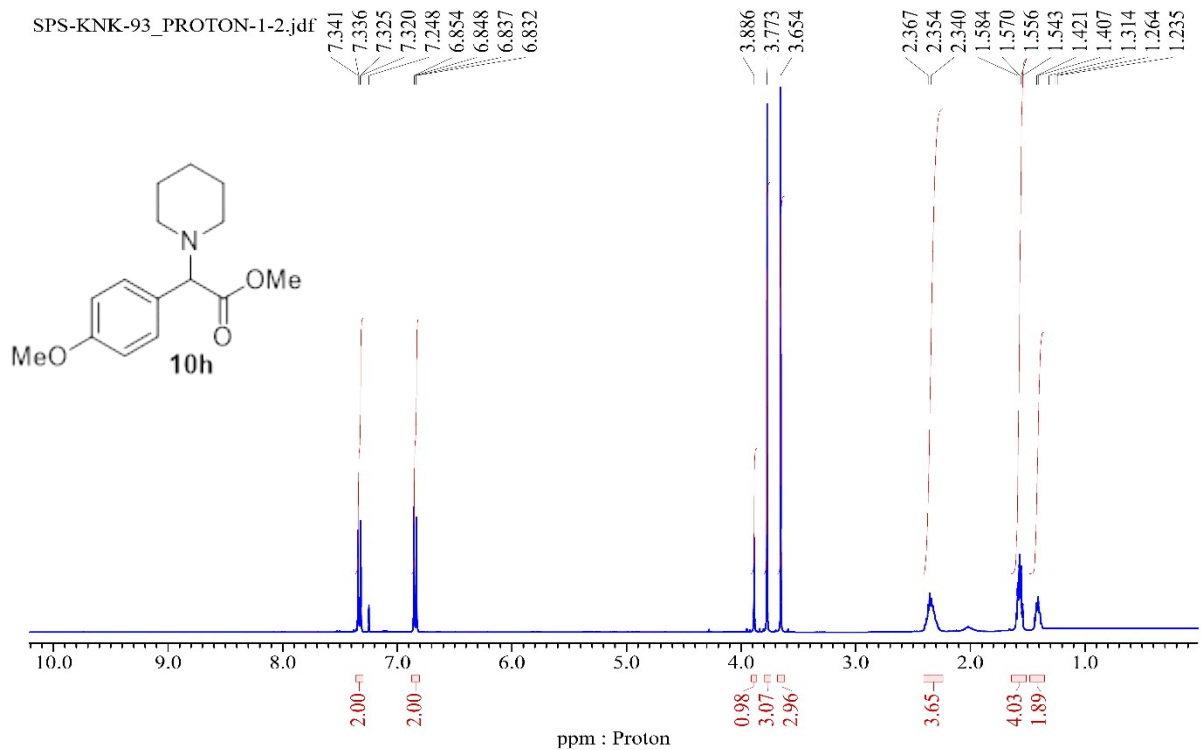

<sup>1</sup>H NMR spectrum of **10h**

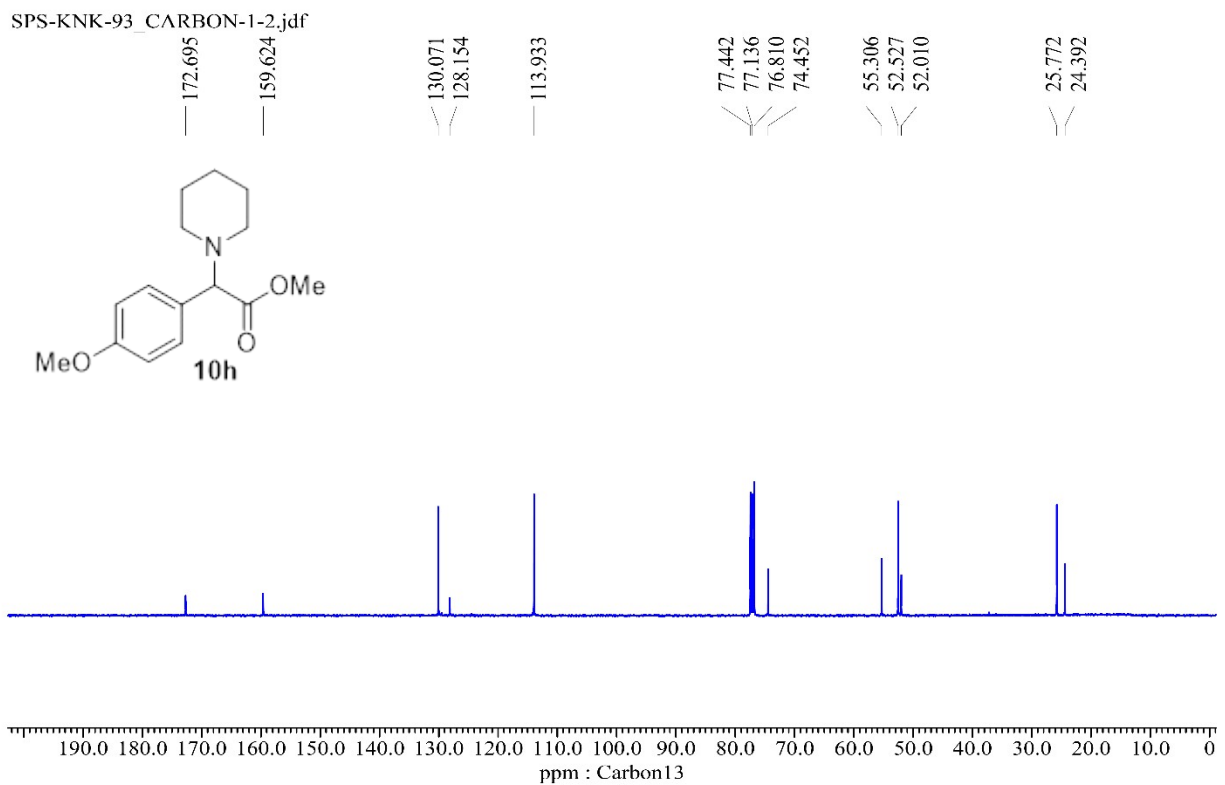

<sup>13</sup>C NMR spectrum of **10h**

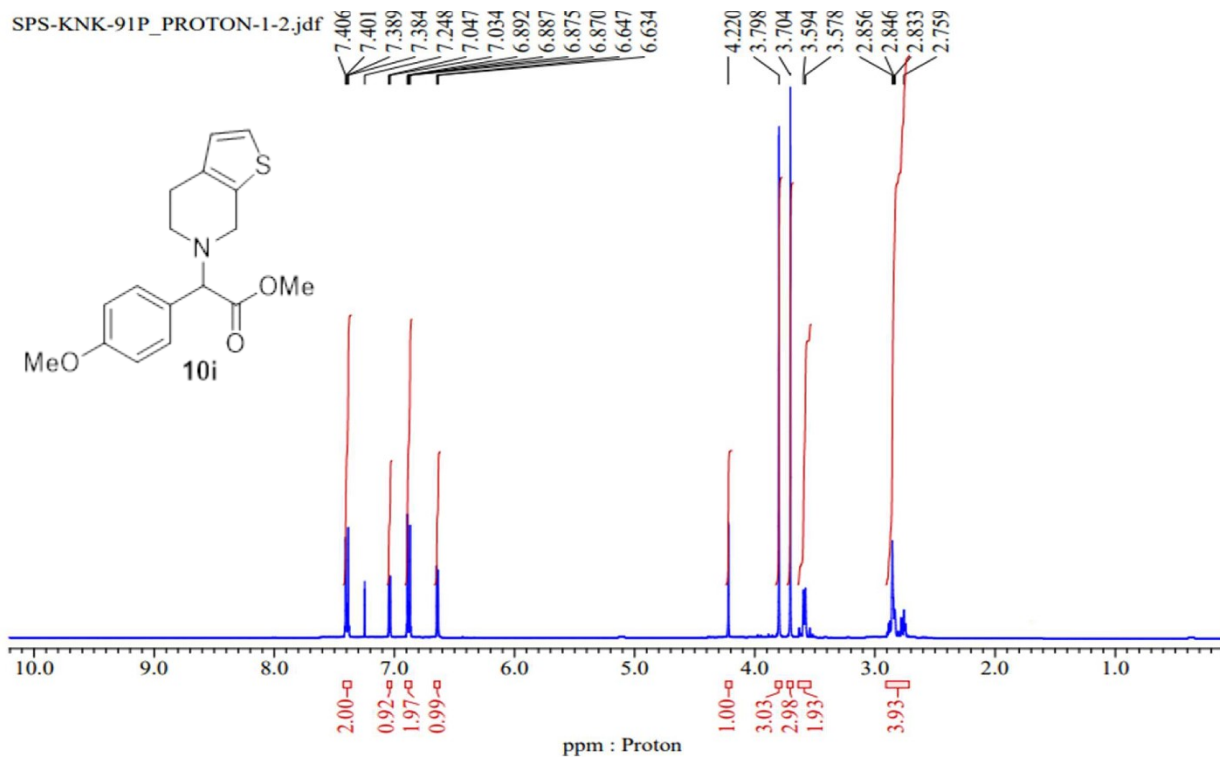

<sup>1</sup>H NMR spectrum of **10i**

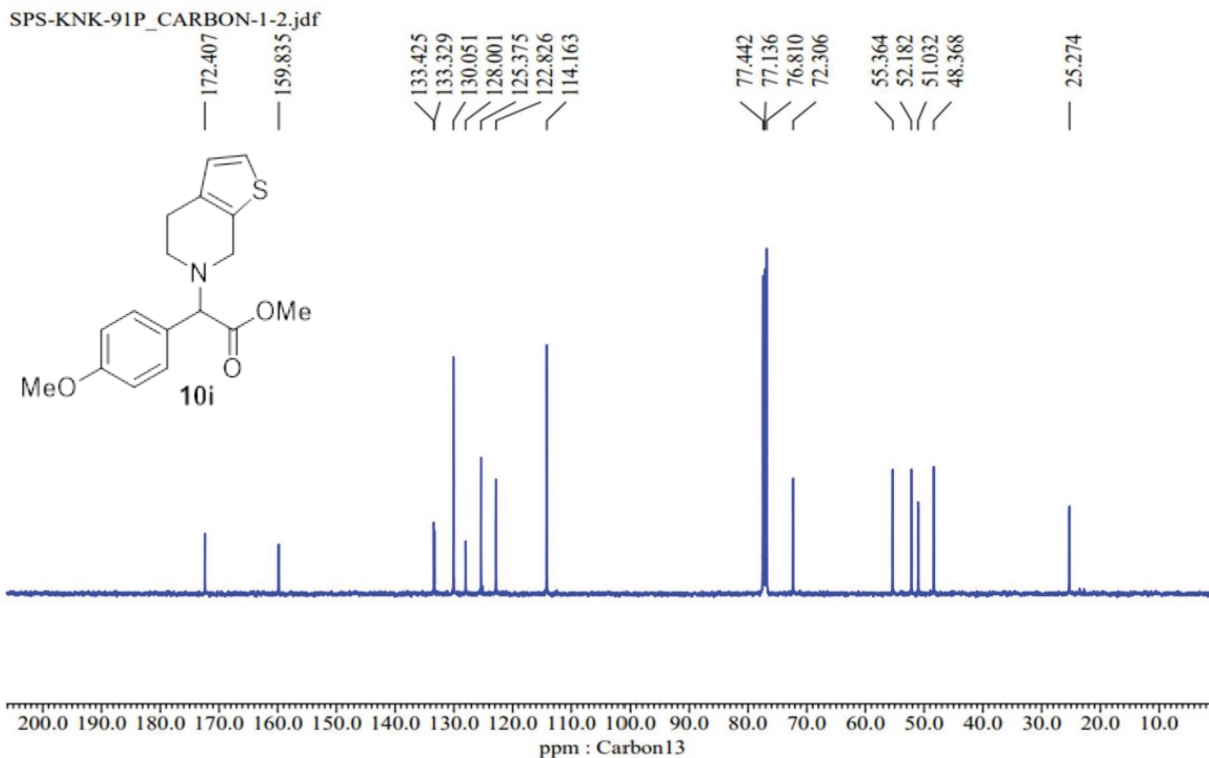

<sup>13</sup>C NMR spectrum of **10i**



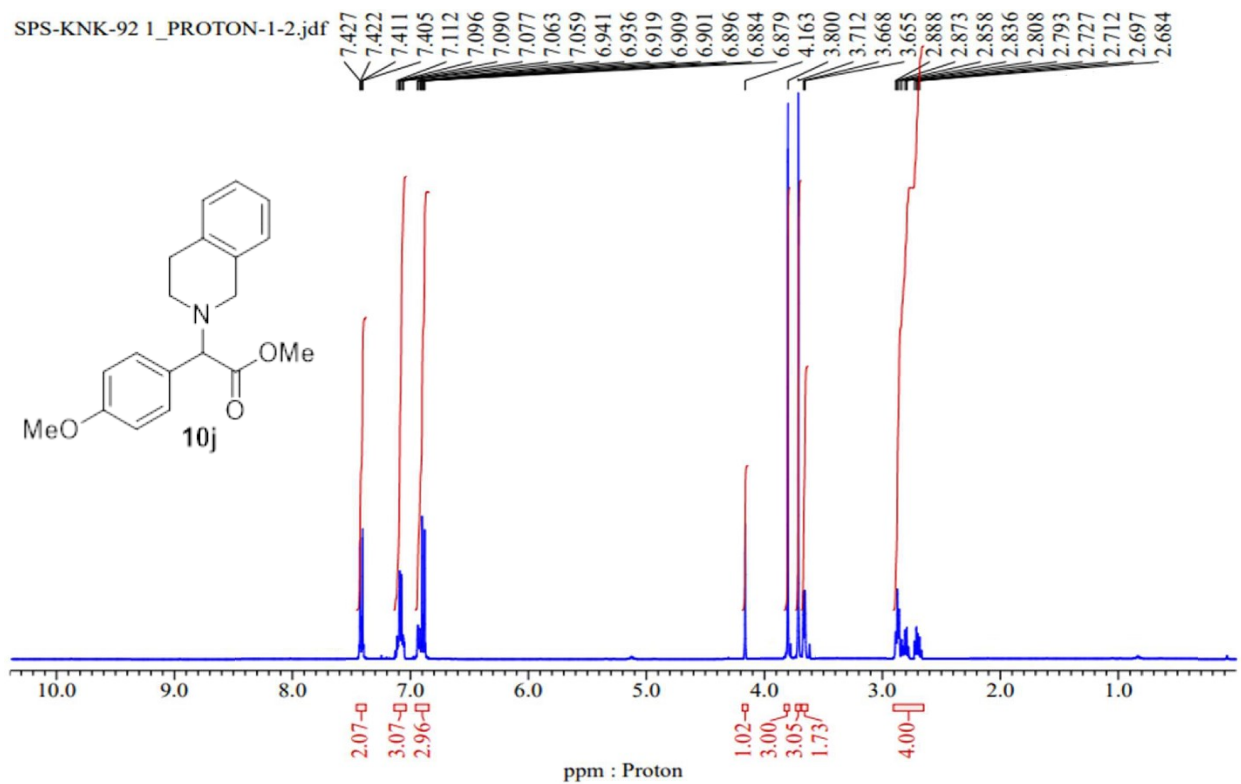

$^1\text{H}$  NMR spectrum of **10j**

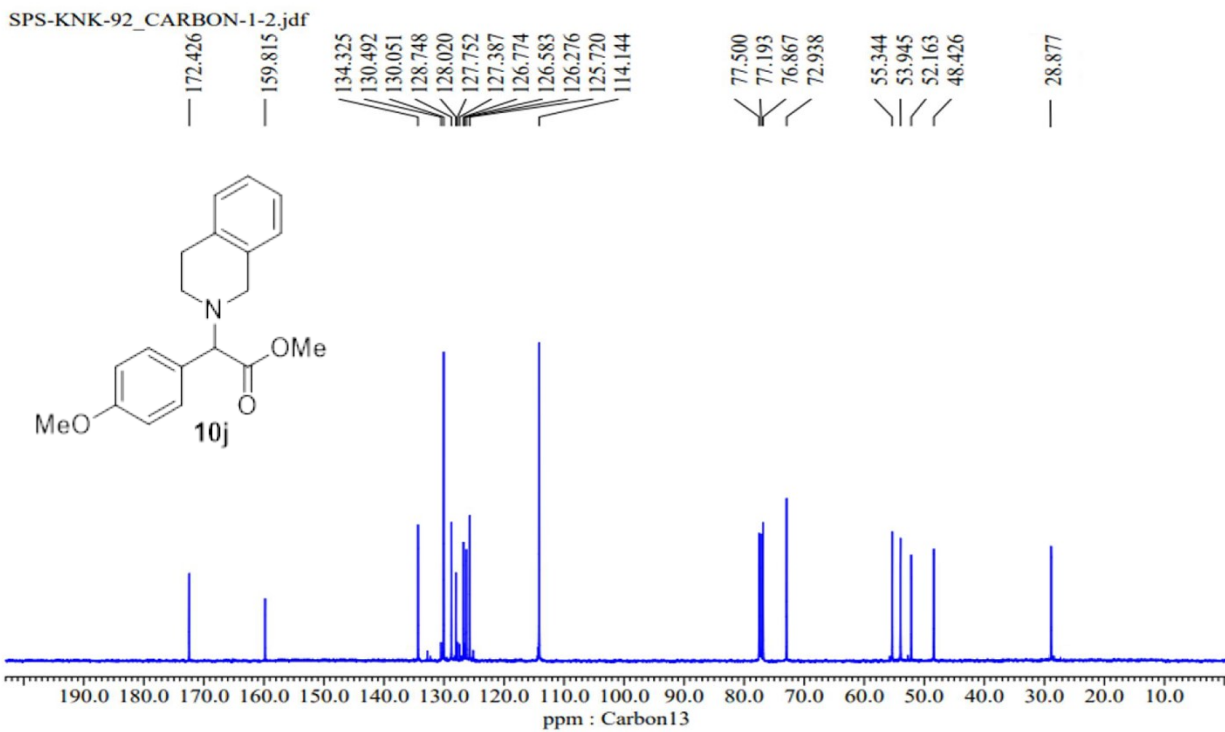

$^{13}\text{C}$  NMR spectrum of **10j**

SPS-YC-49\_PROTON-1-2.jdf

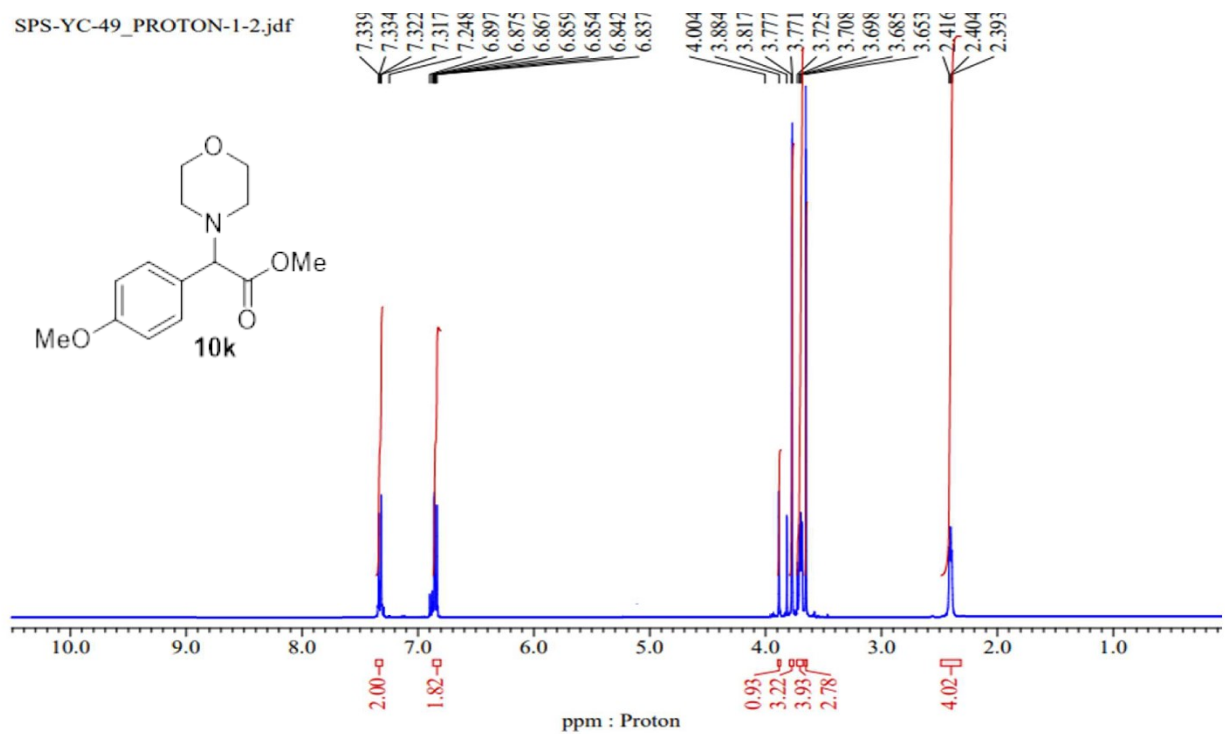

<sup>1</sup>H NMR spectrum of **10k**

SPS-YC-49\_CARBON-1-2.jdf

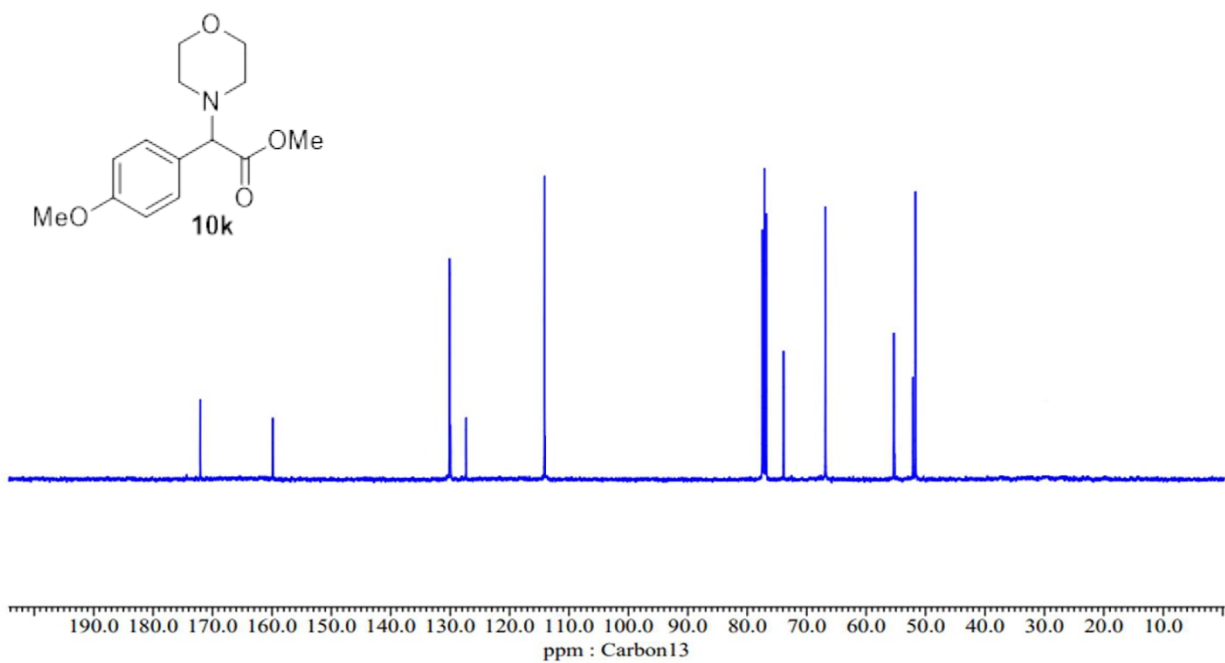

<sup>13</sup>C NMR spectrum of **10k**

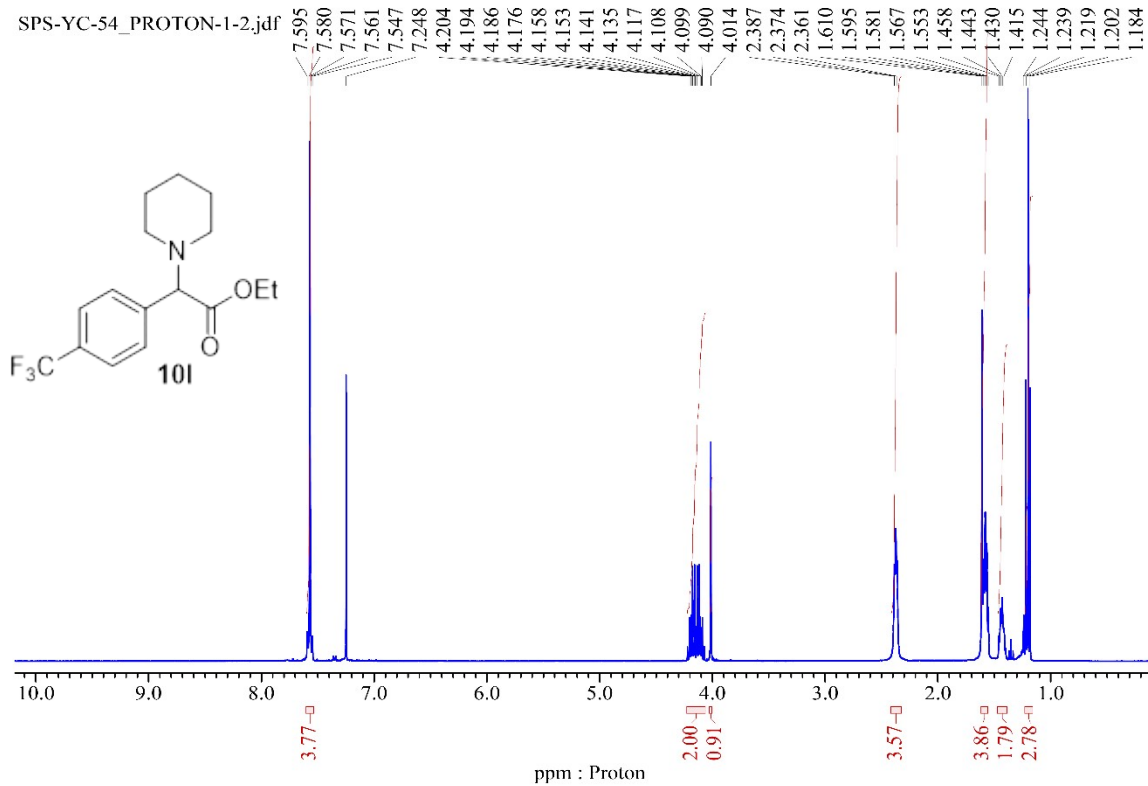

<sup>1</sup>H NMR spectrum of **101**

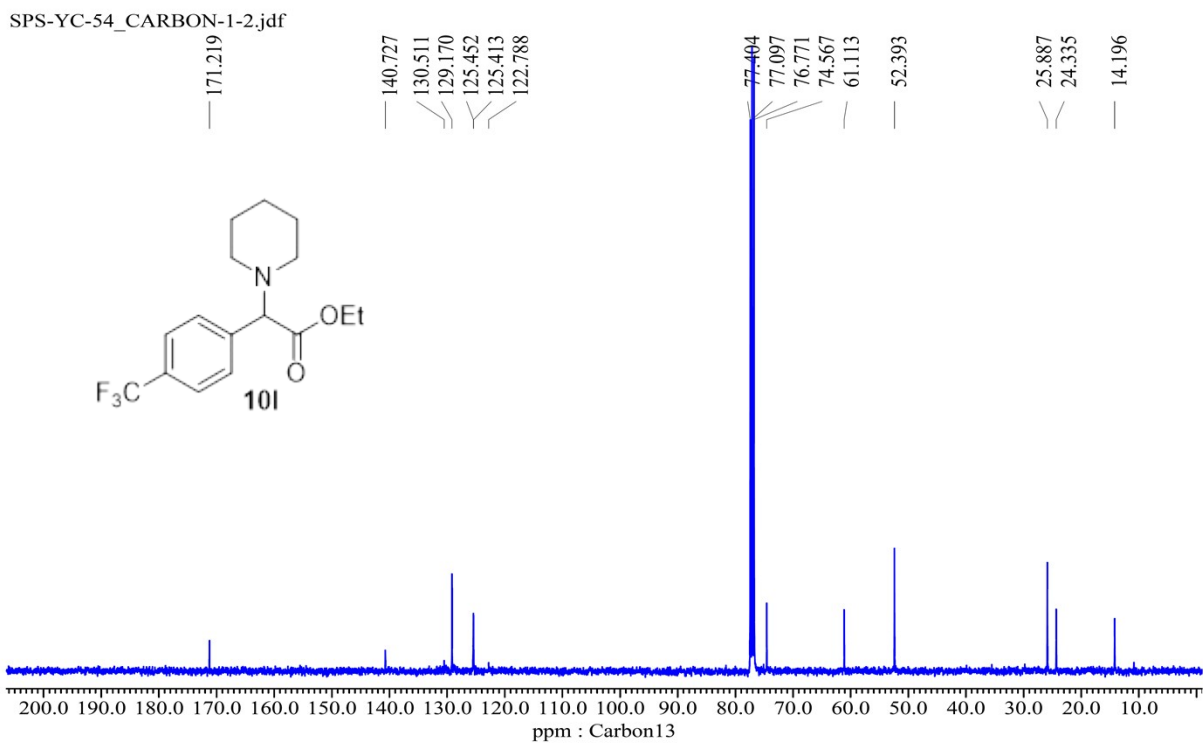

<sup>13</sup>C NMR spectrum of **101**

-62.471

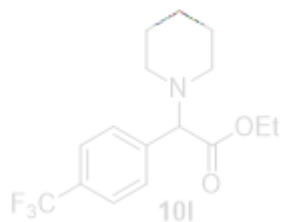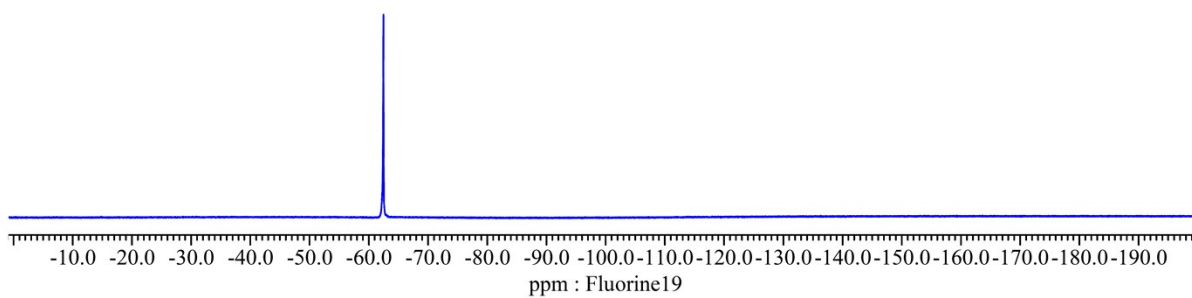

$^{19}\text{F}$  NMR spectrum of **101**

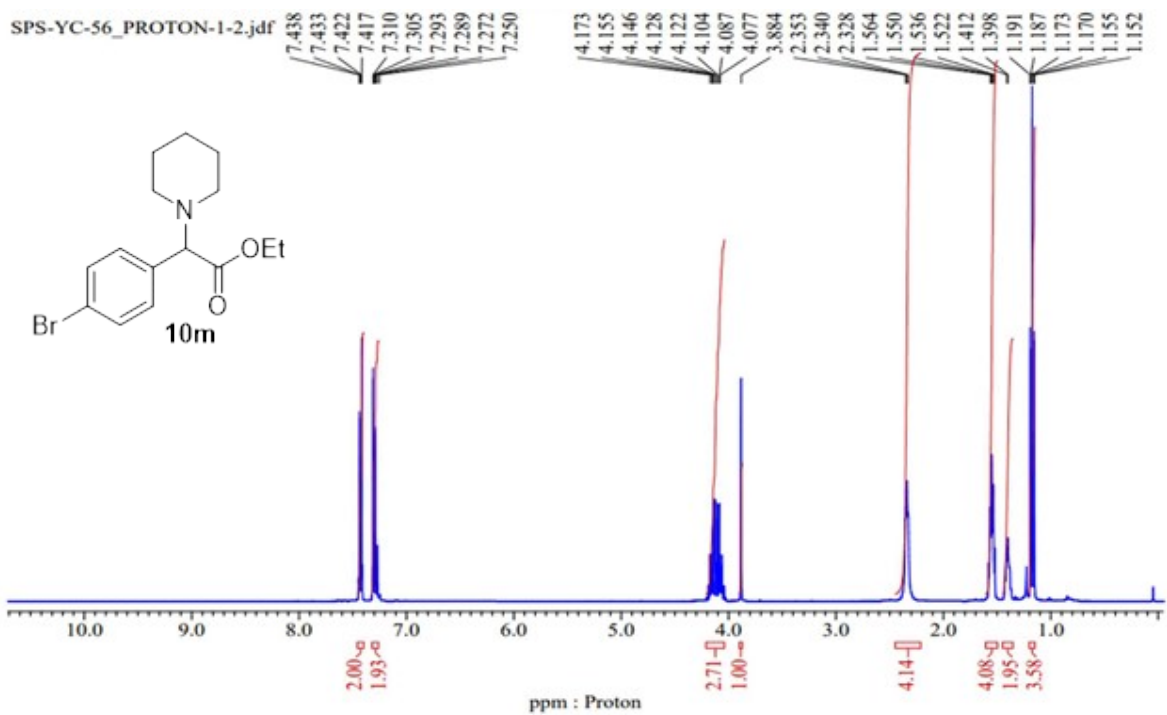

$^1\text{H}$  NMR spectrum of **10m**

SPS-YC-56\_CARBOON-1-2.jdf

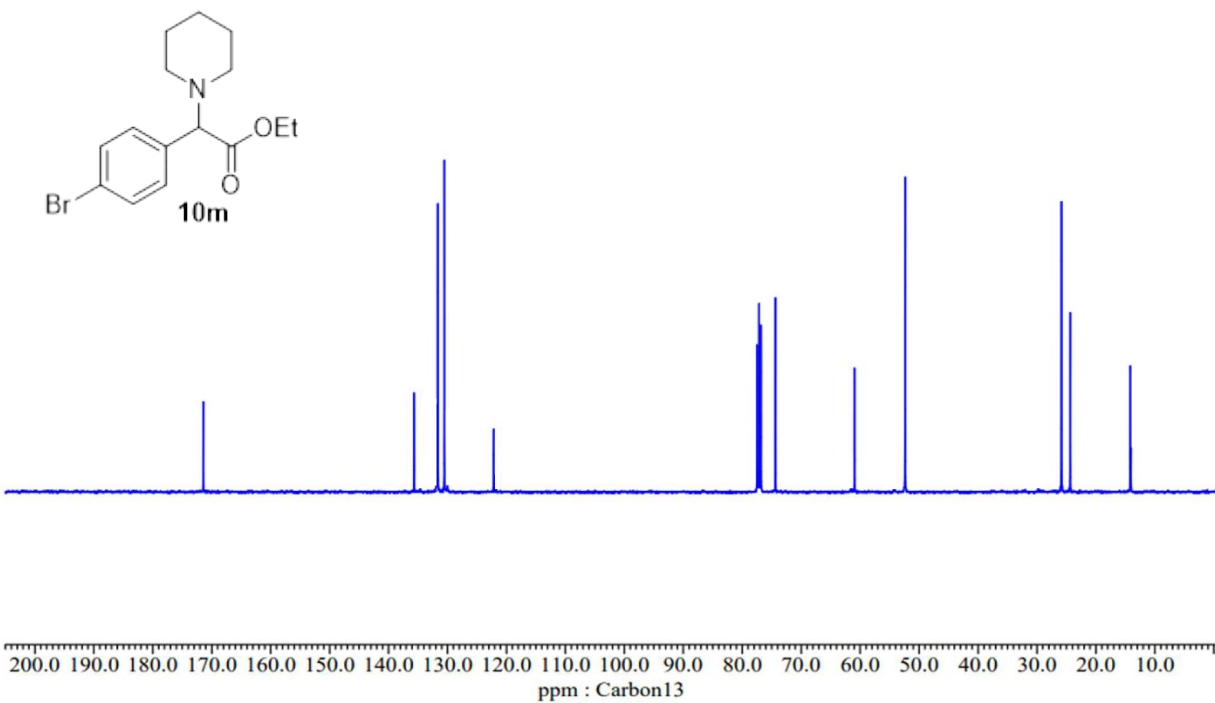

$^{13}\text{C}$  NMR spectrum of **10m**

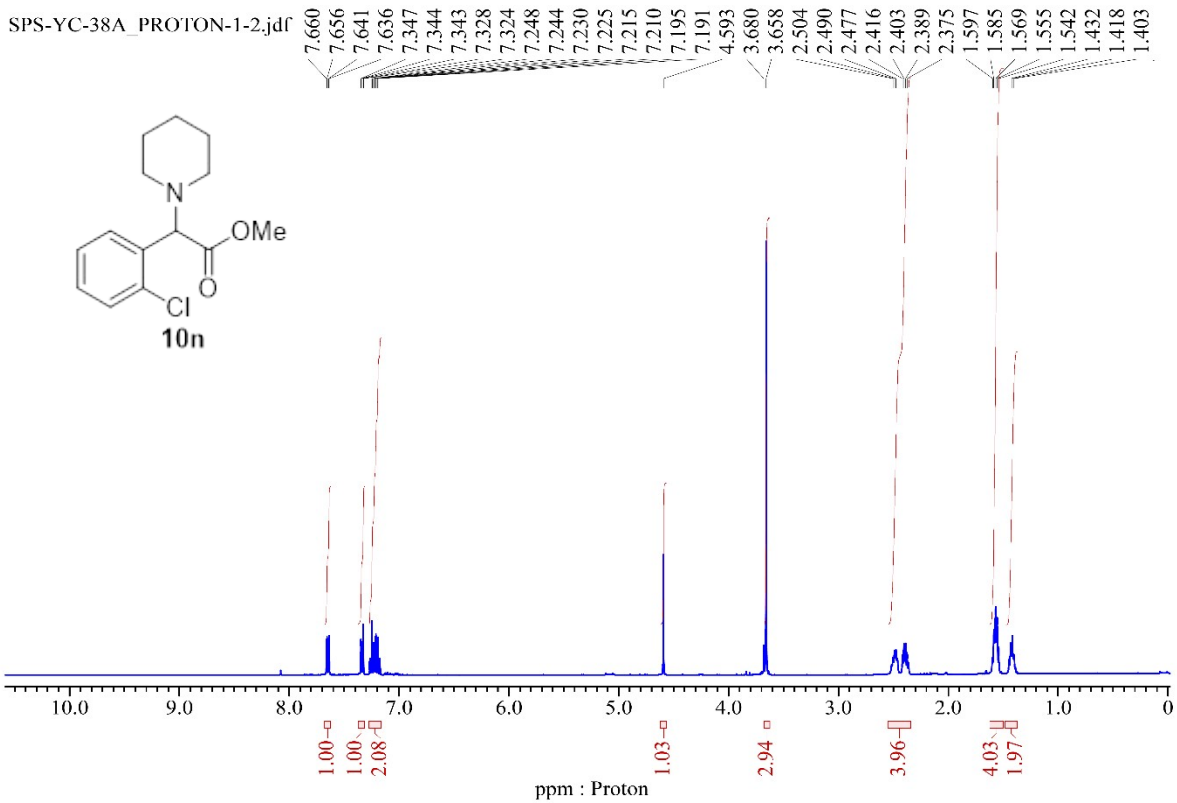

<sup>1</sup>H NMR spectrum of **10n**

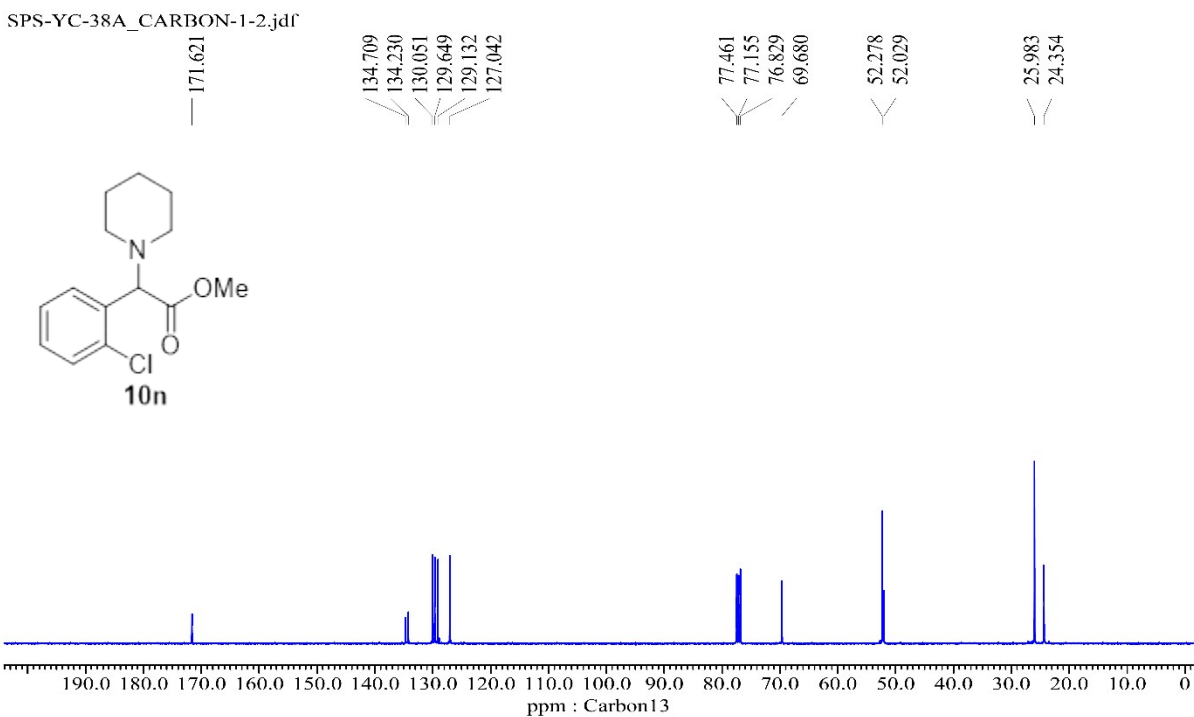

<sup>13</sup>C NMR spectrum of **10n**

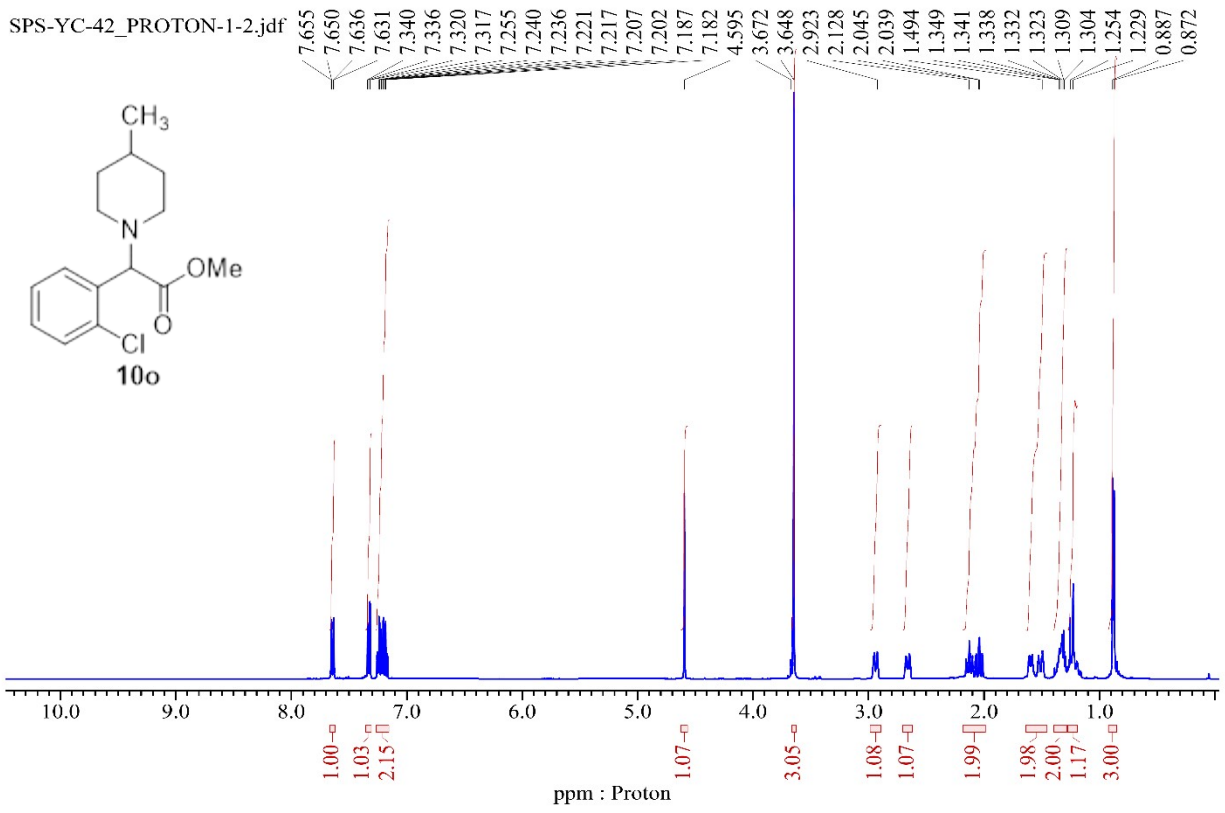

<sup>1</sup>H NMR spectrum of **10o**

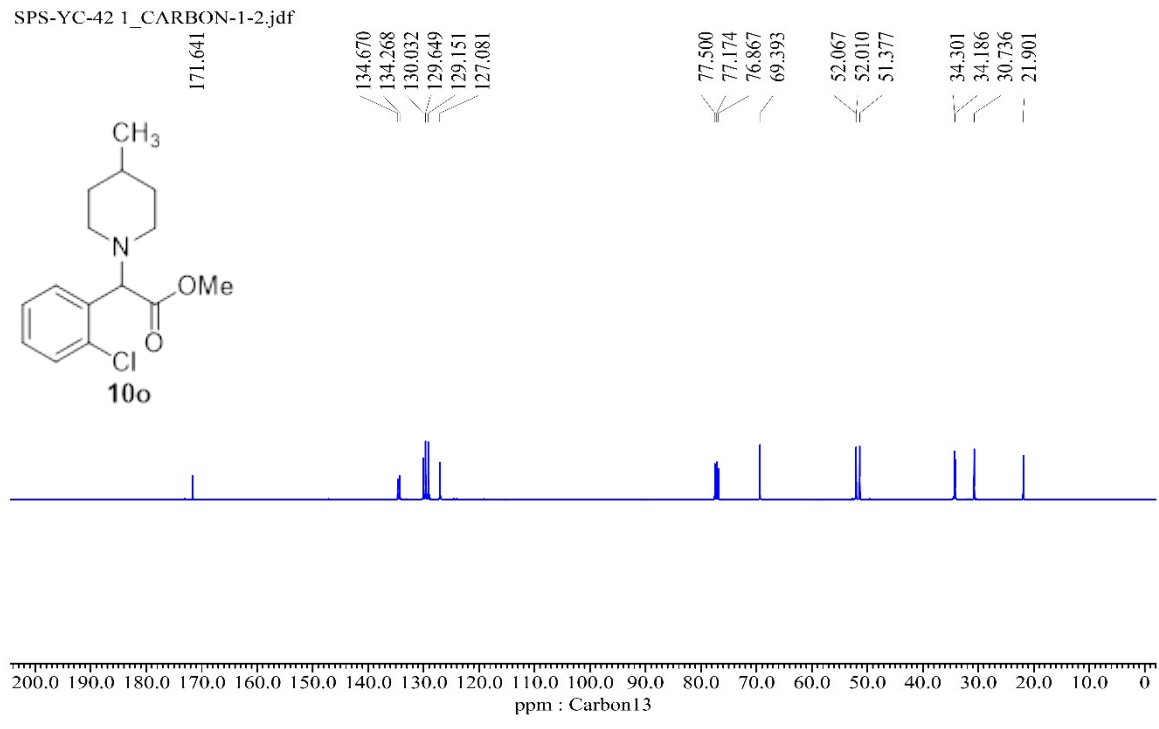

<sup>13</sup>C NMR spectrum of **10o**

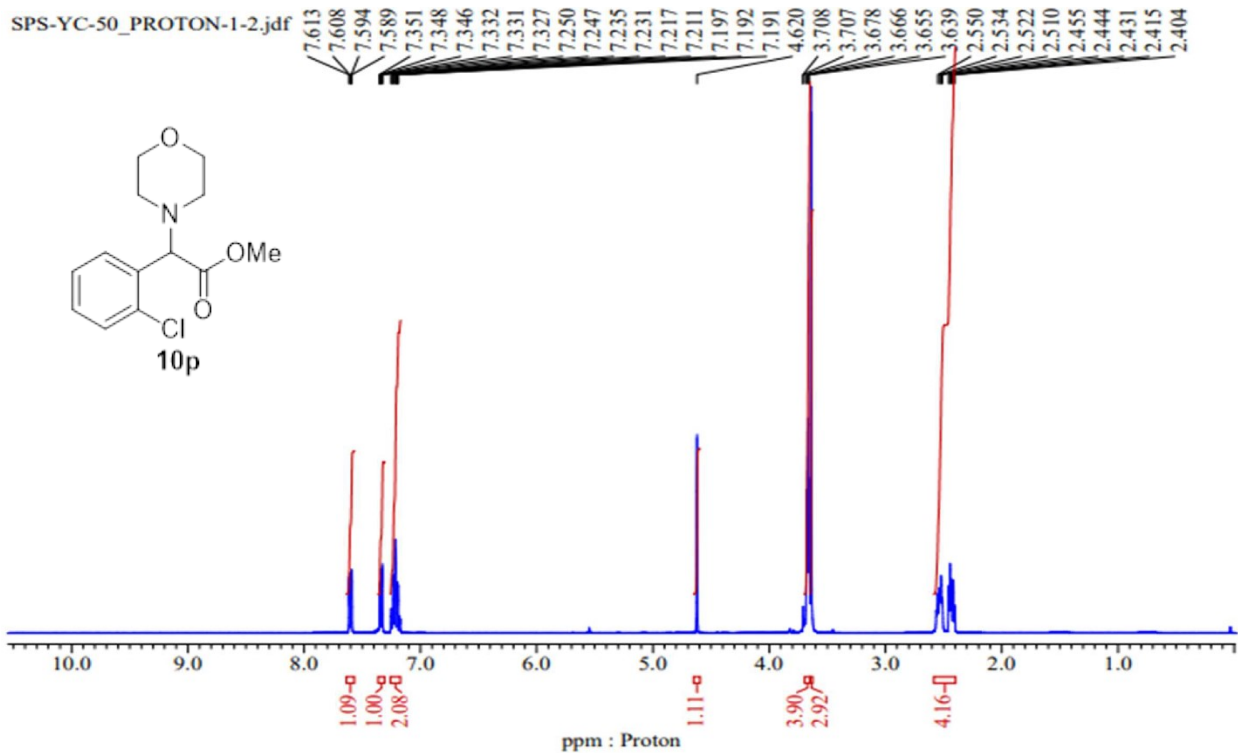

<sup>1</sup>H NMR spectrum of **10p**

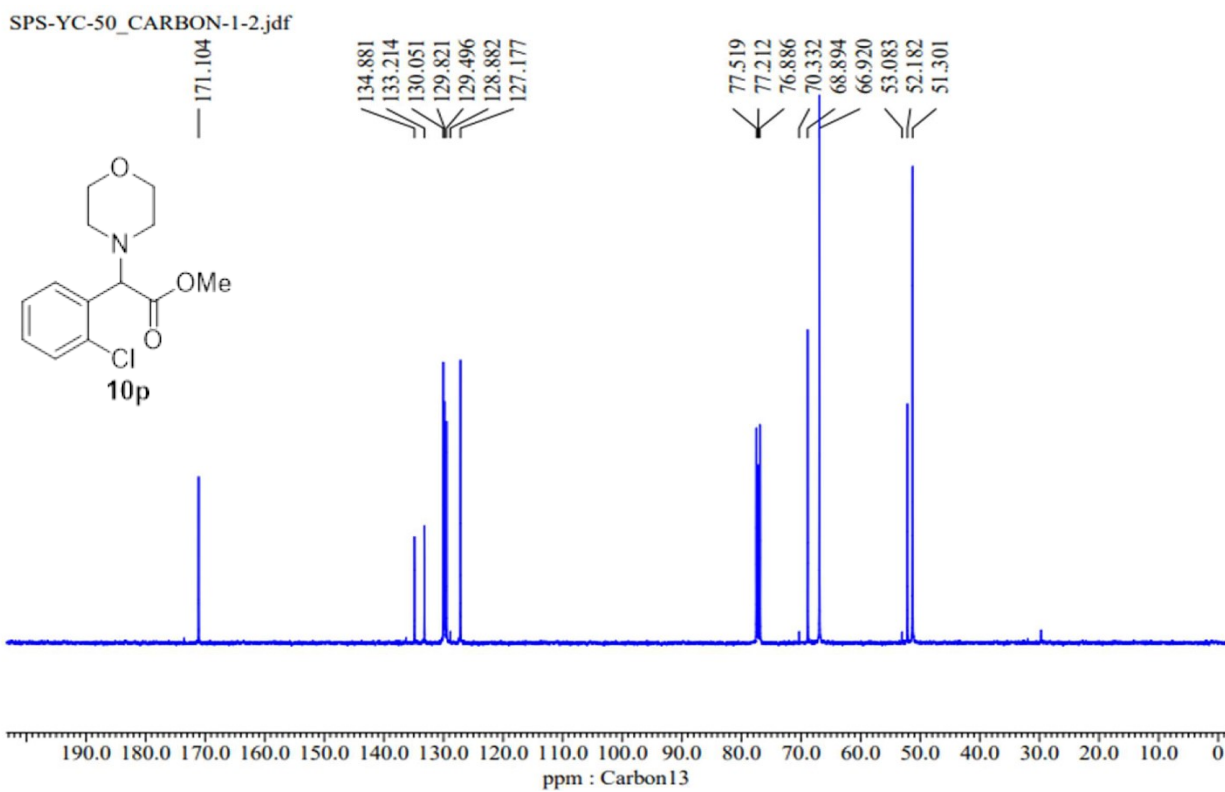

<sup>13</sup>C NMR spectrum of **10p**



SPS-YC-39\_PROTON-2-2.jdf

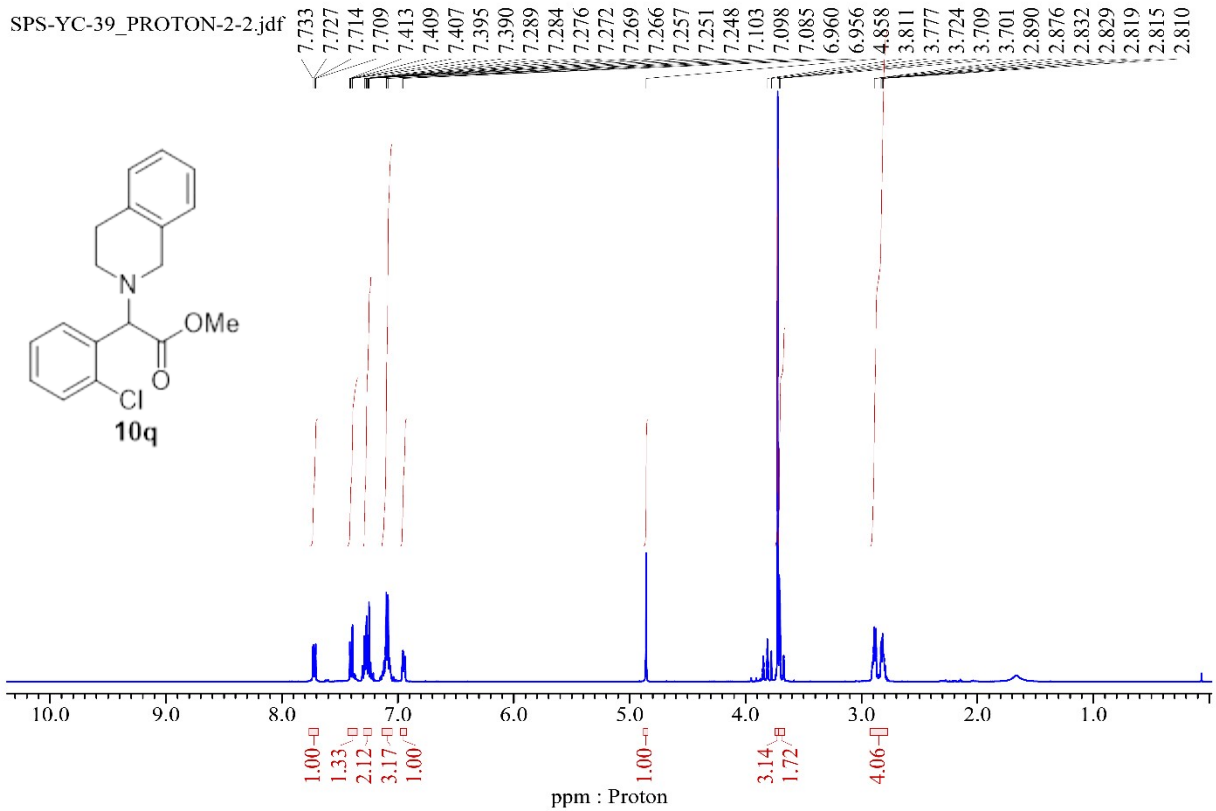

<sup>1</sup>H NMR spectrum of **10q**

SPS-YC-39\_CARBON-1-2.jdf

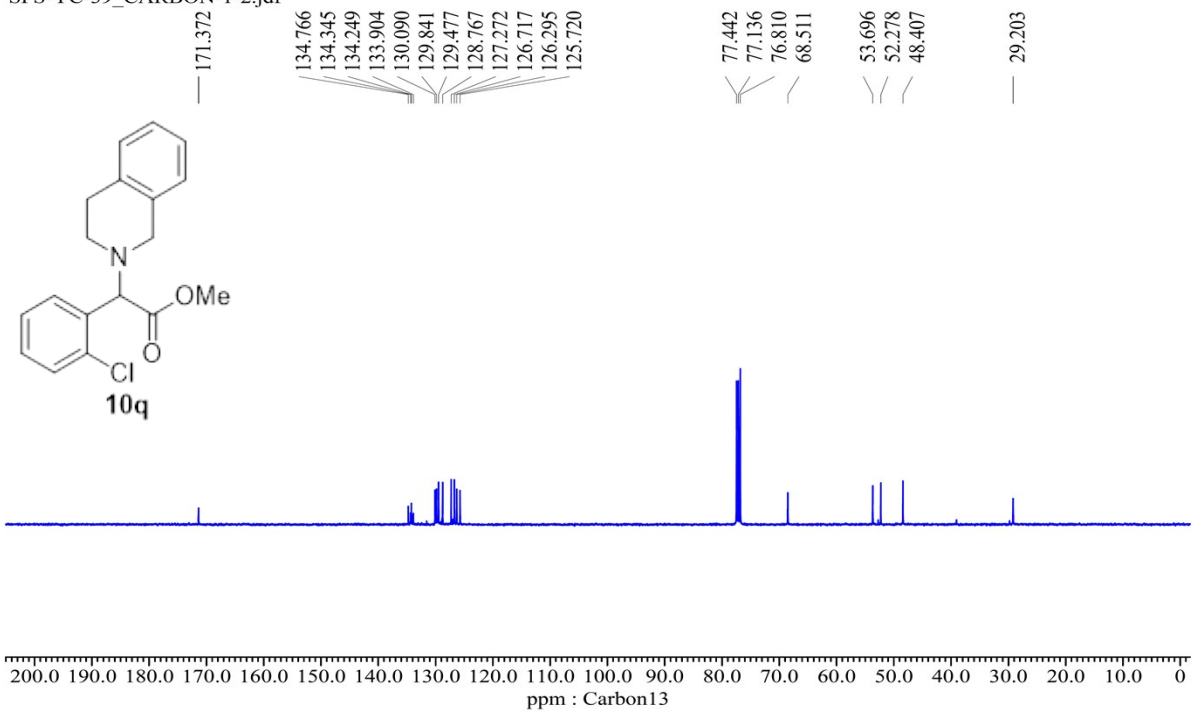

<sup>13</sup>C NMR spectrum of **10q**

SPS-YC-41\_PROTON-1-2.jdf

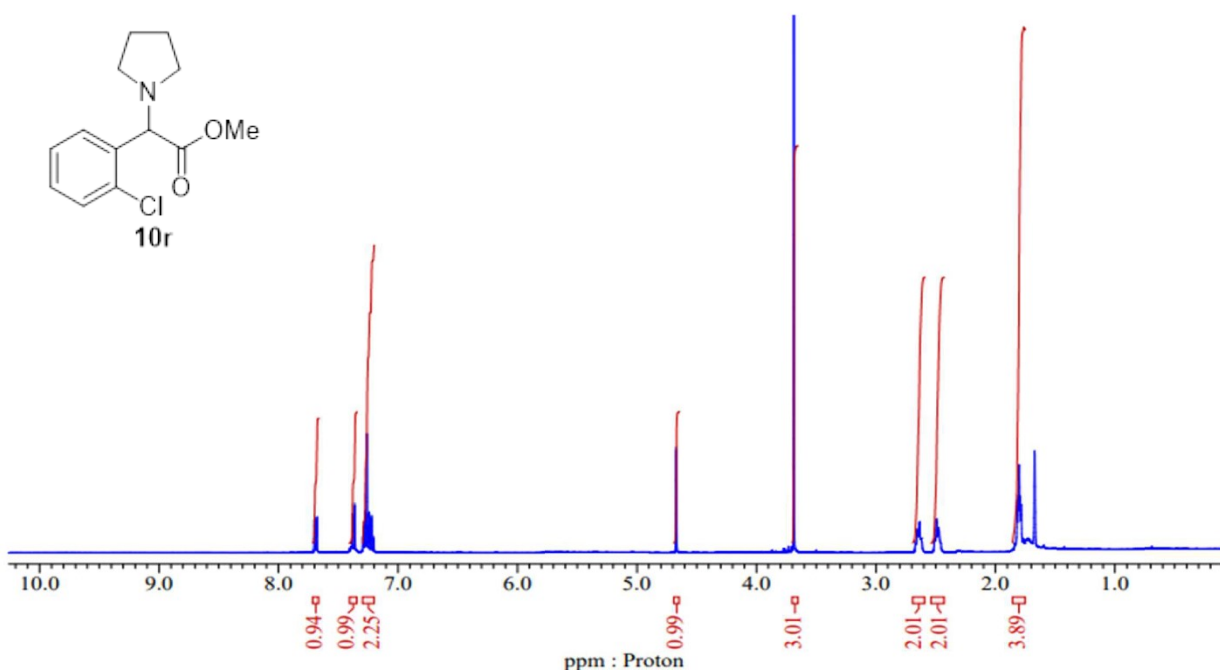

<sup>1</sup>H NMR spectrum of **10r**

SPS-YC-41 13\_CARBON-1-2.jdf

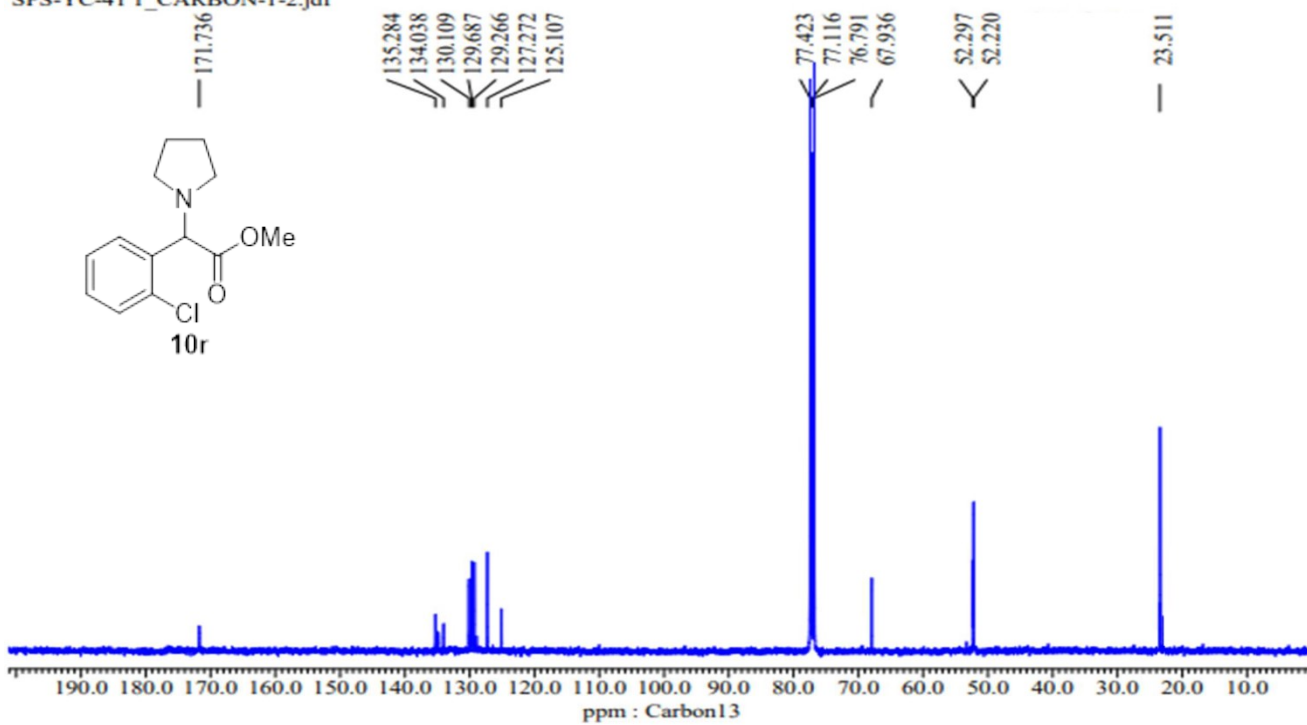

<sup>13</sup>C NMR spectrum of **10r**

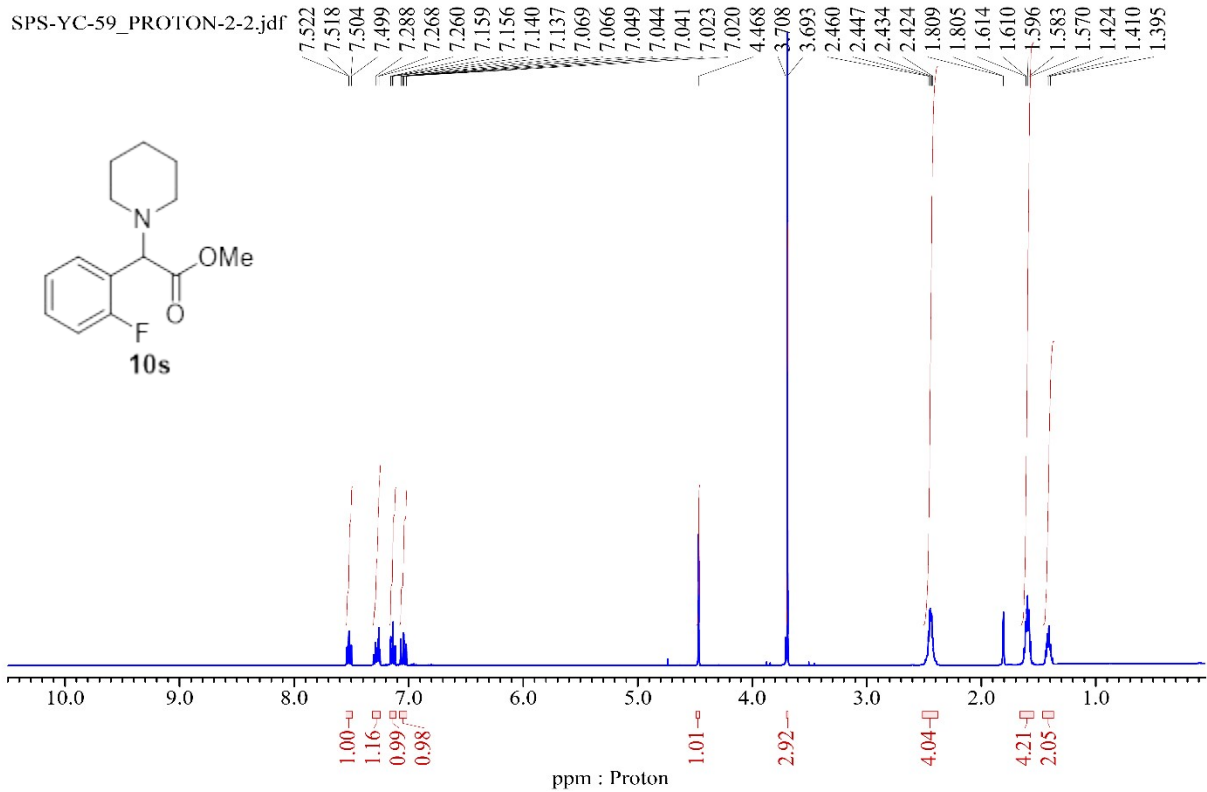

<sup>1</sup>H NMR spectrum of **10s**

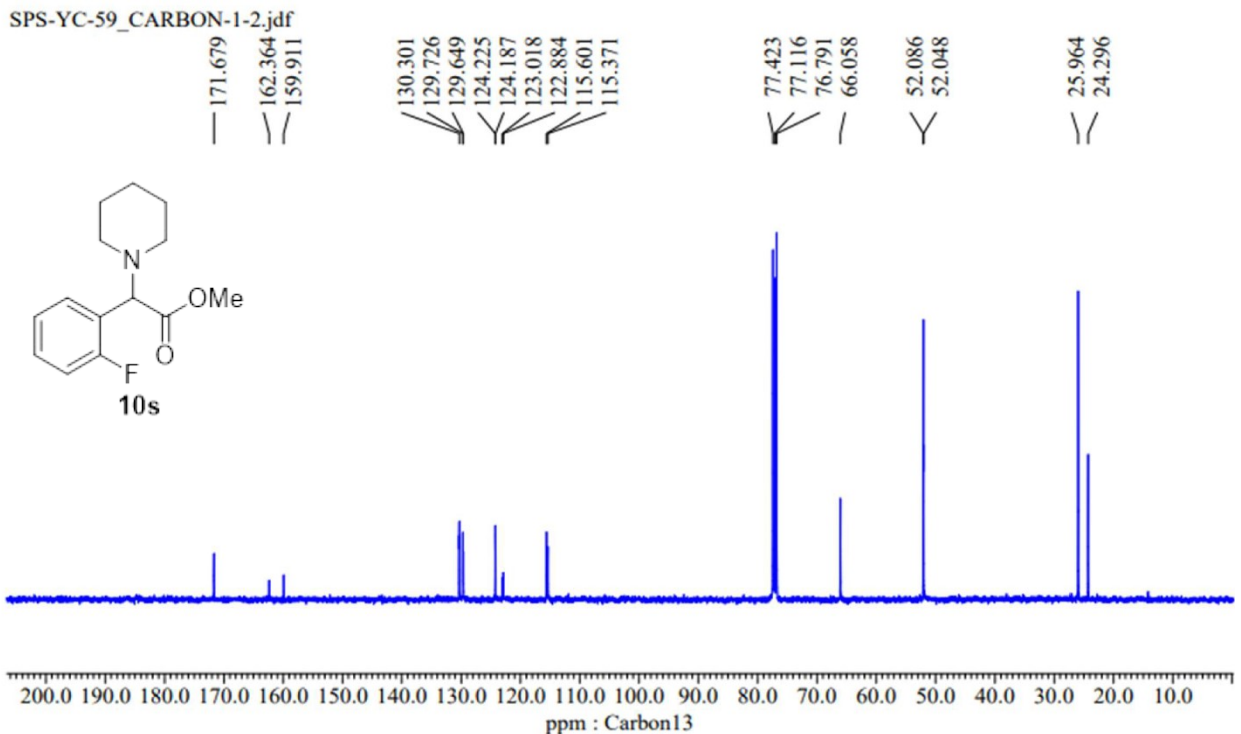

<sup>13</sup>C NMR spectrum of **10s**

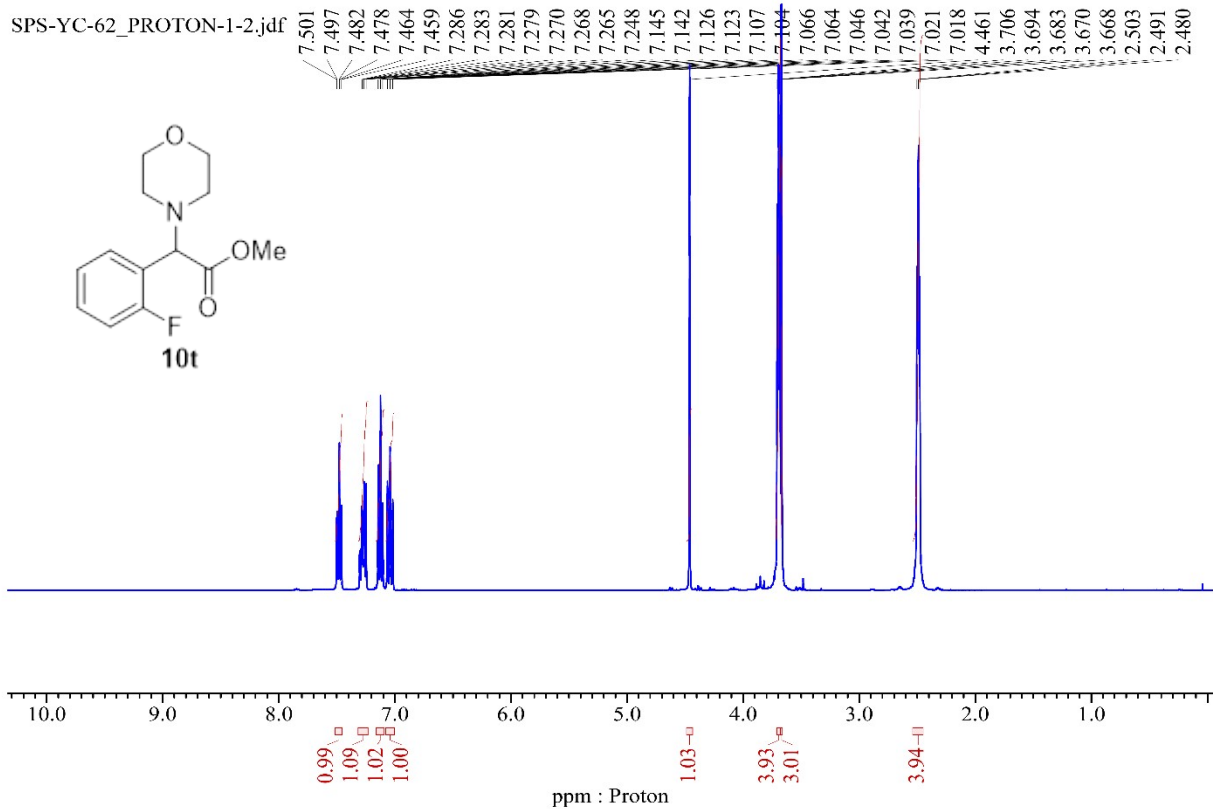

<sup>1</sup>H NMR spectrum of **10t**

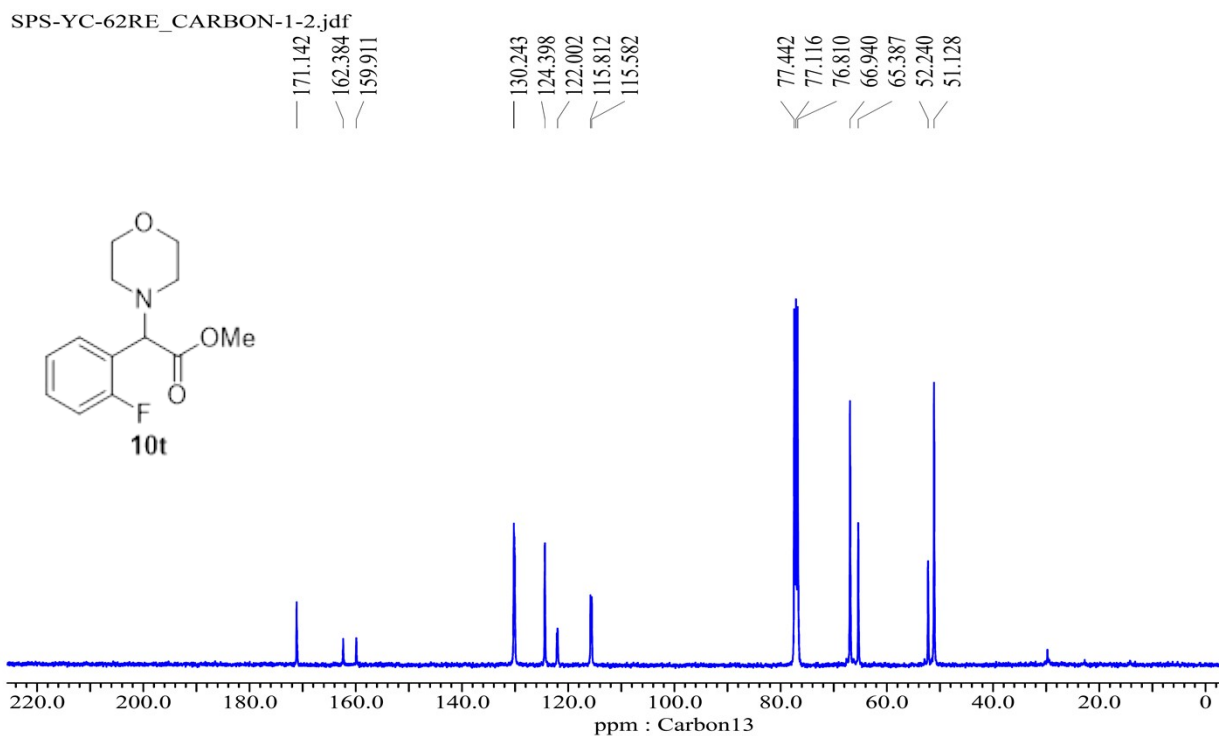

<sup>13</sup>C NMR spectrum of **10t**

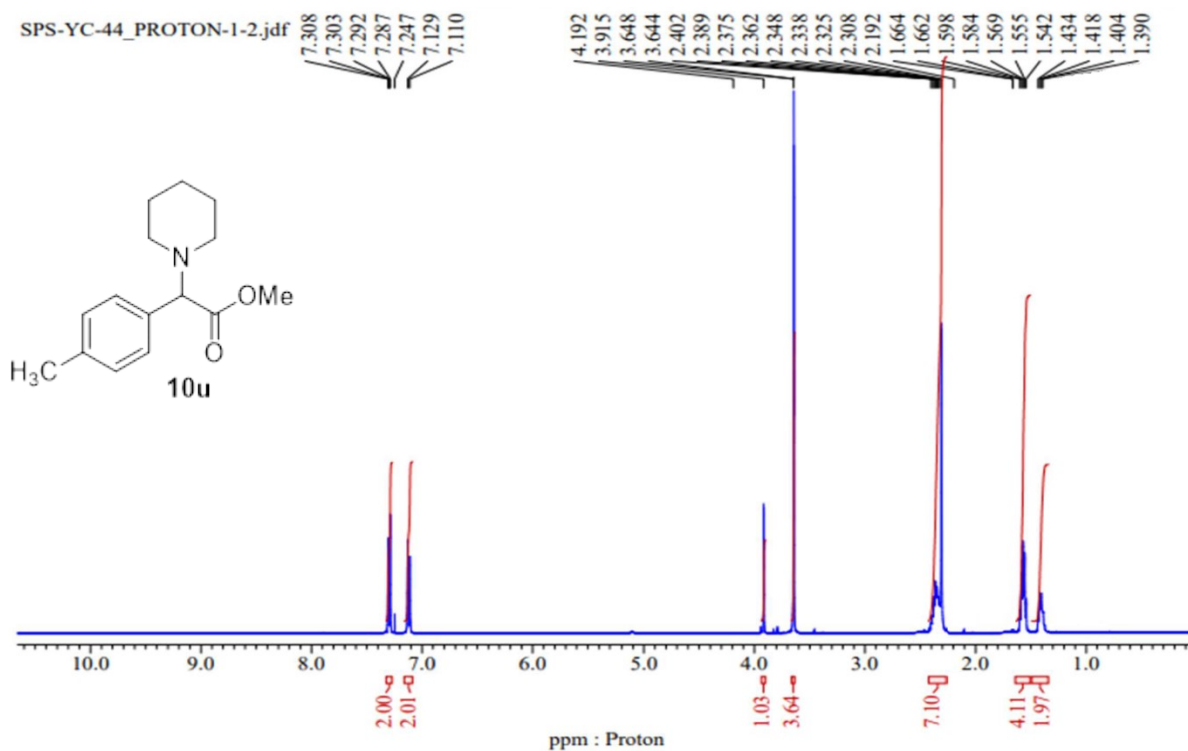

<sup>1</sup>H NMR spectrum of **10u**

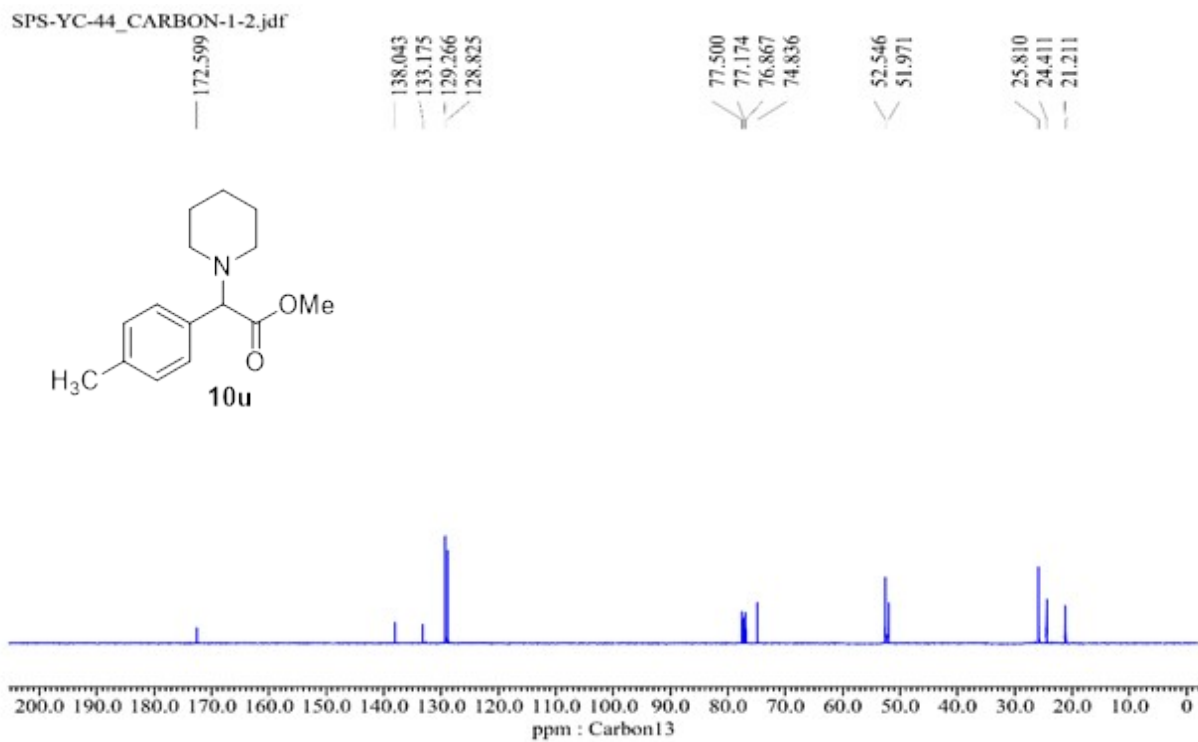

<sup>13</sup>C NMR spectrum of **10u**

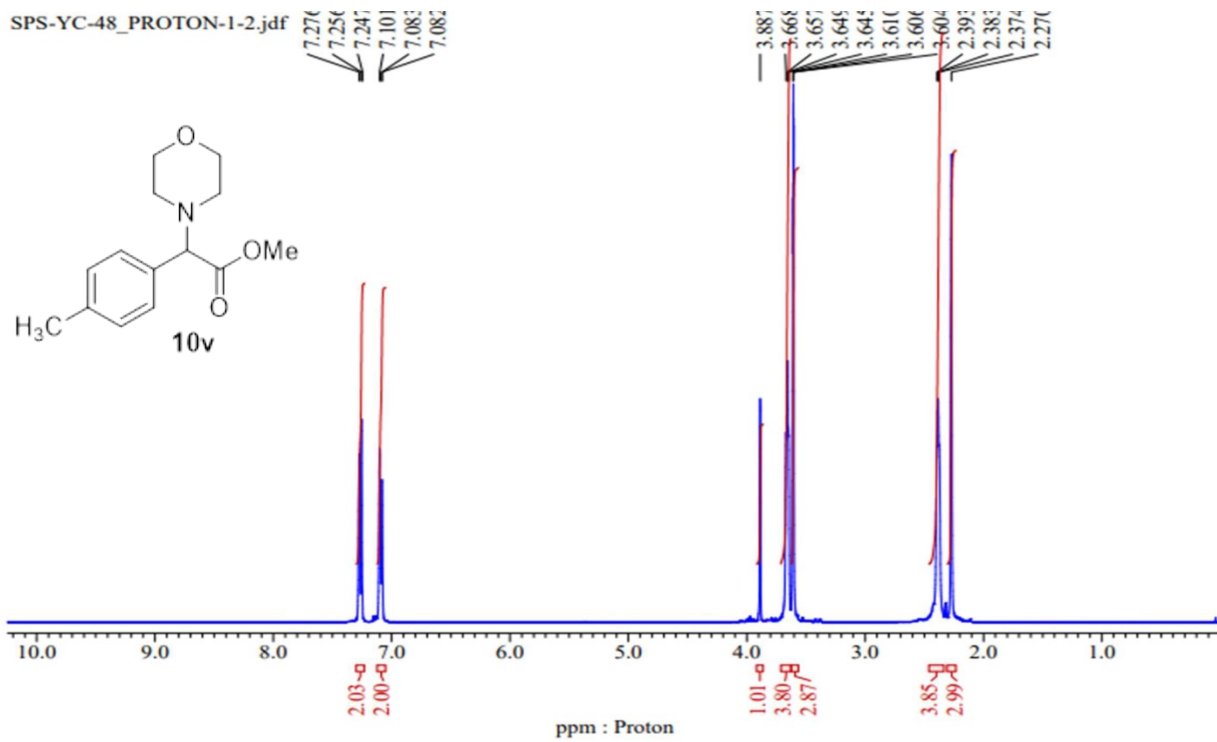

$^1\text{H}$  NMR spectrum of **10v**

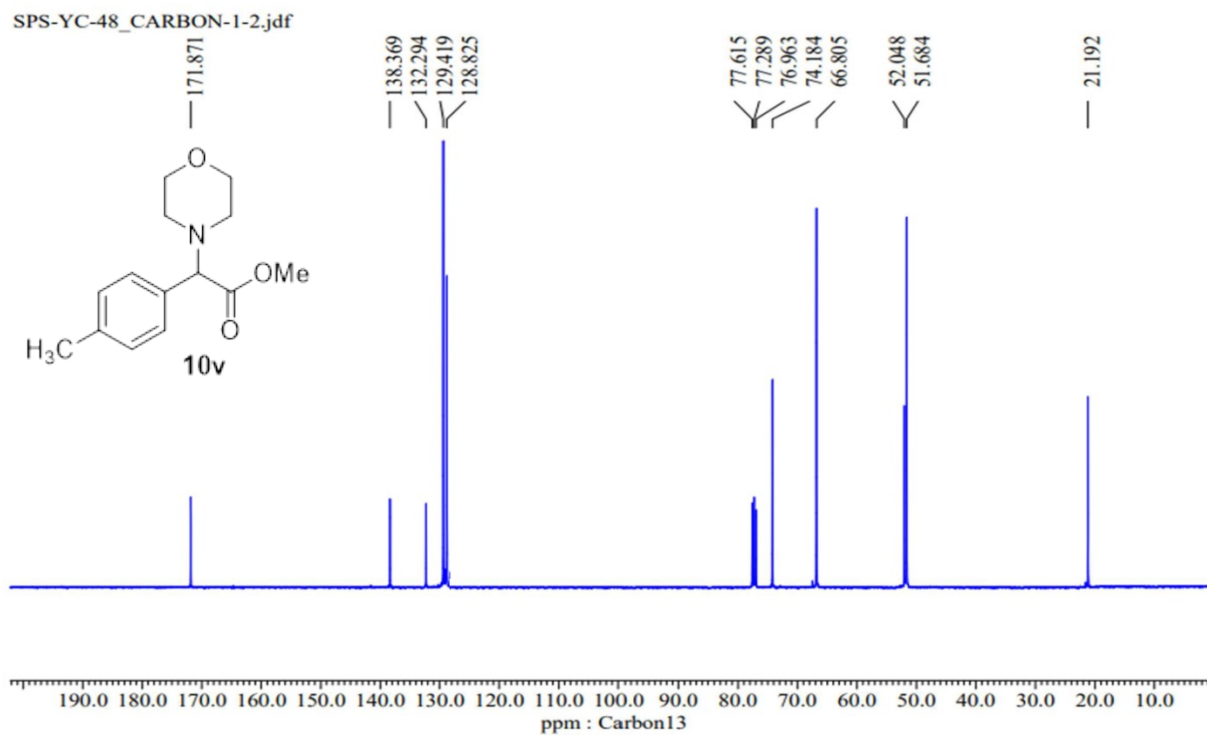

$^{13}\text{C}$  NMR spectrum of **10v**

SPS-KNK-97\_PROTON-2-2.jdf

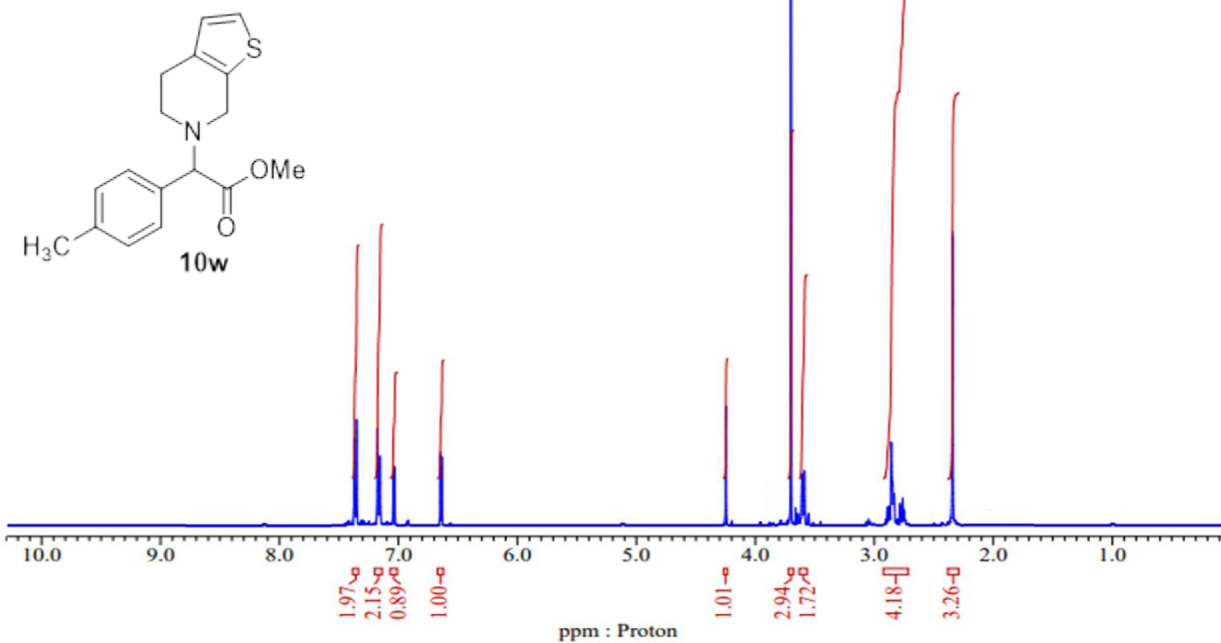

<sup>1</sup>H NMR spectrum of **10w**

SPS-KNK-97\_CARBON-1-2.jdf

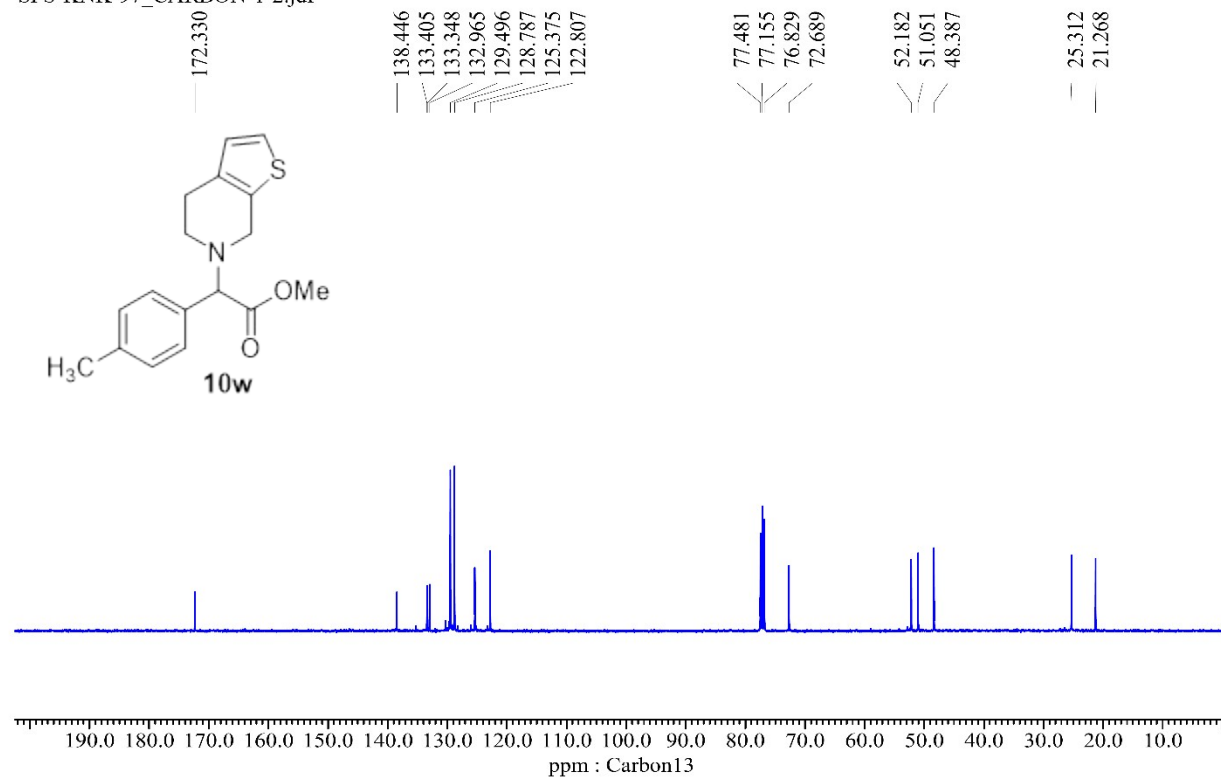

<sup>13</sup>C NMR spectrum of **10w**

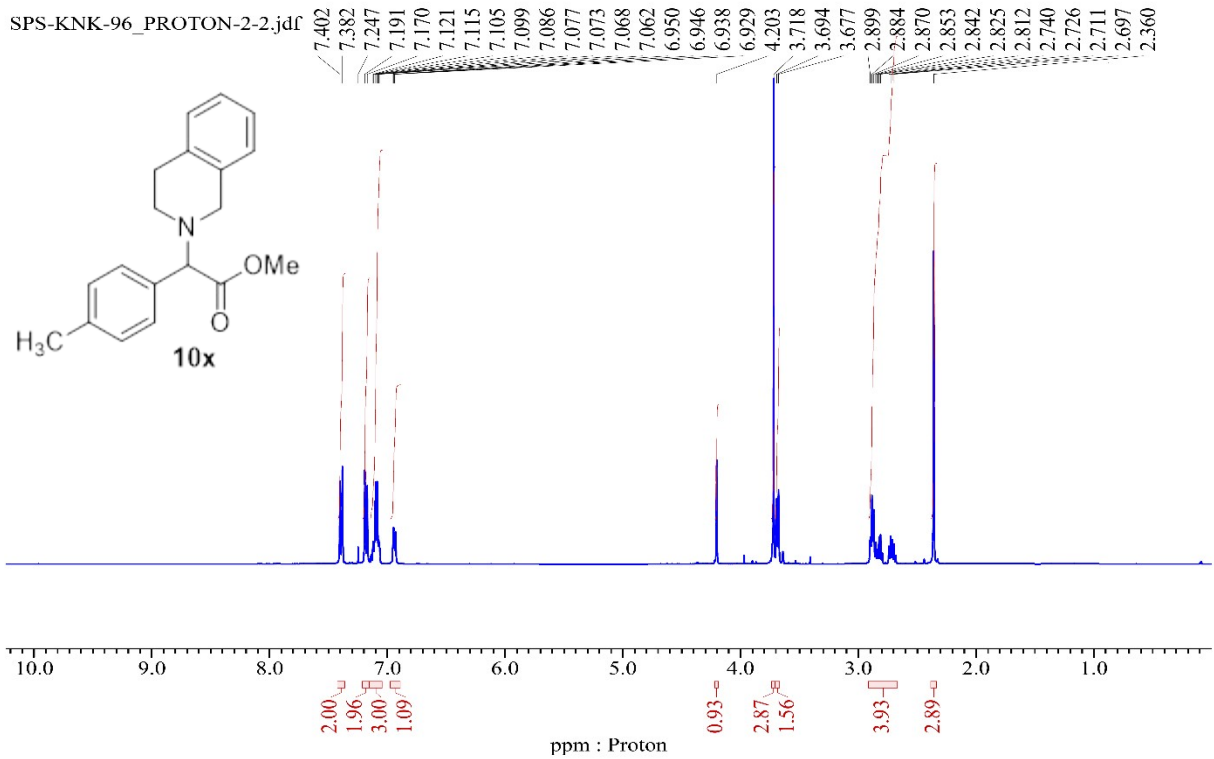

<sup>1</sup>H NMR spectrum of **10x**

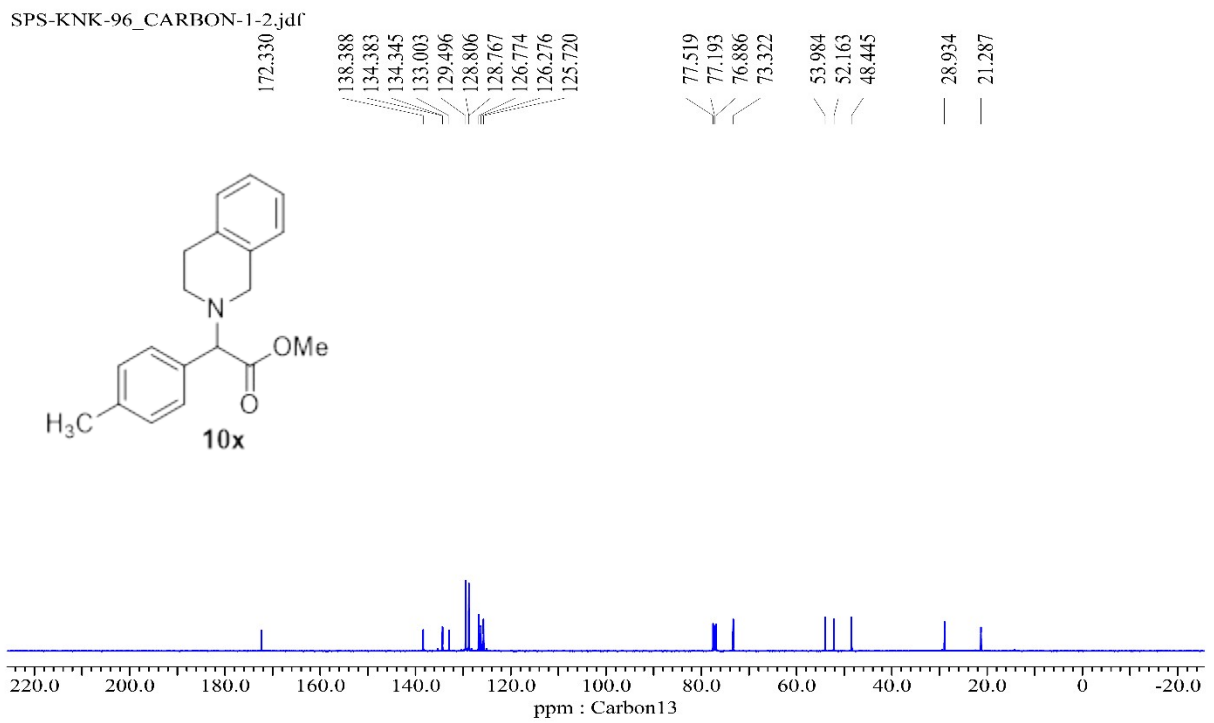

<sup>13</sup>C NMR spectrum of **10x**



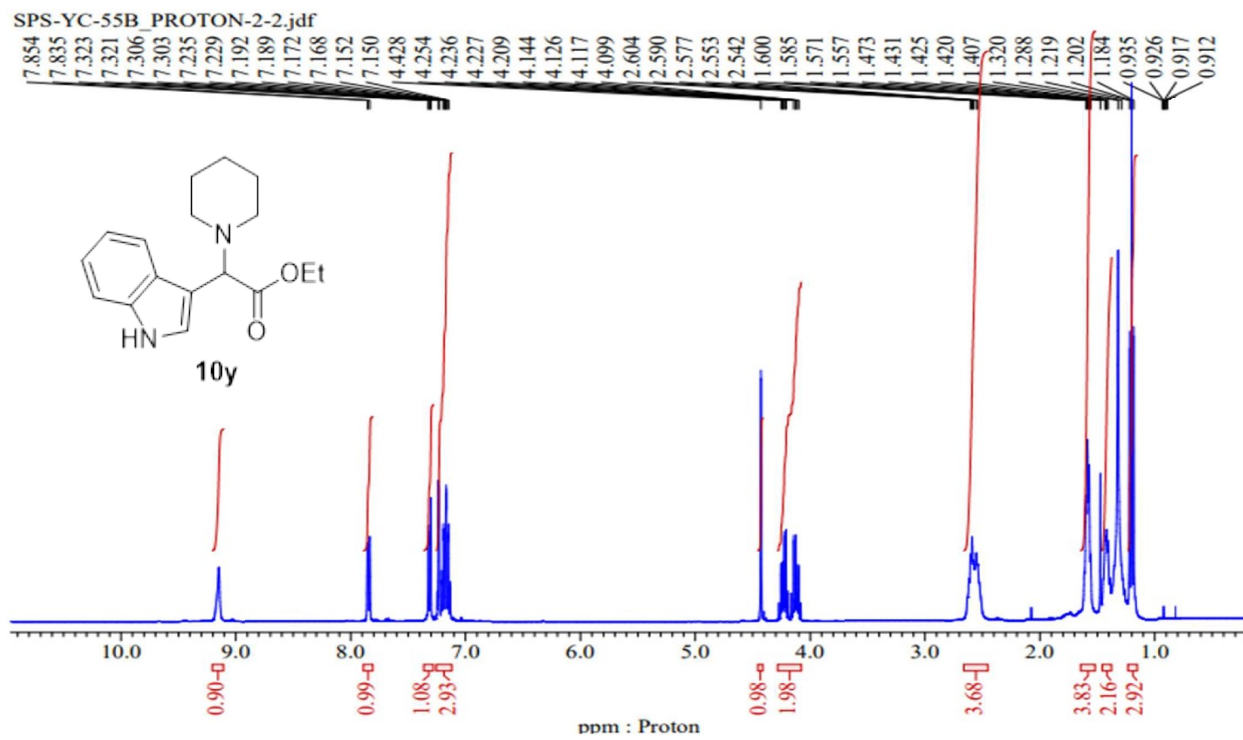

$^1\text{H}$  NMR spectrum of **10y**

SPS-YC-55B\_CARBO-1-2.jdf

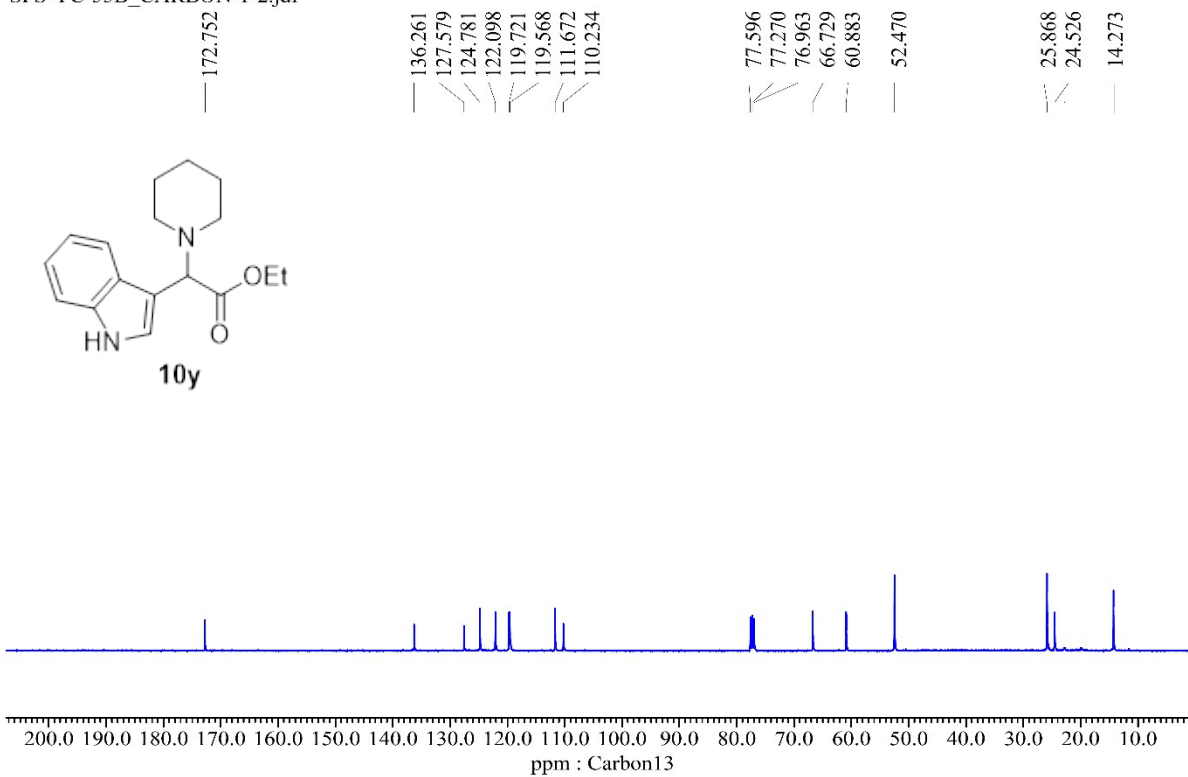

$^{13}\text{C}$  NMR spectrum of **10y**

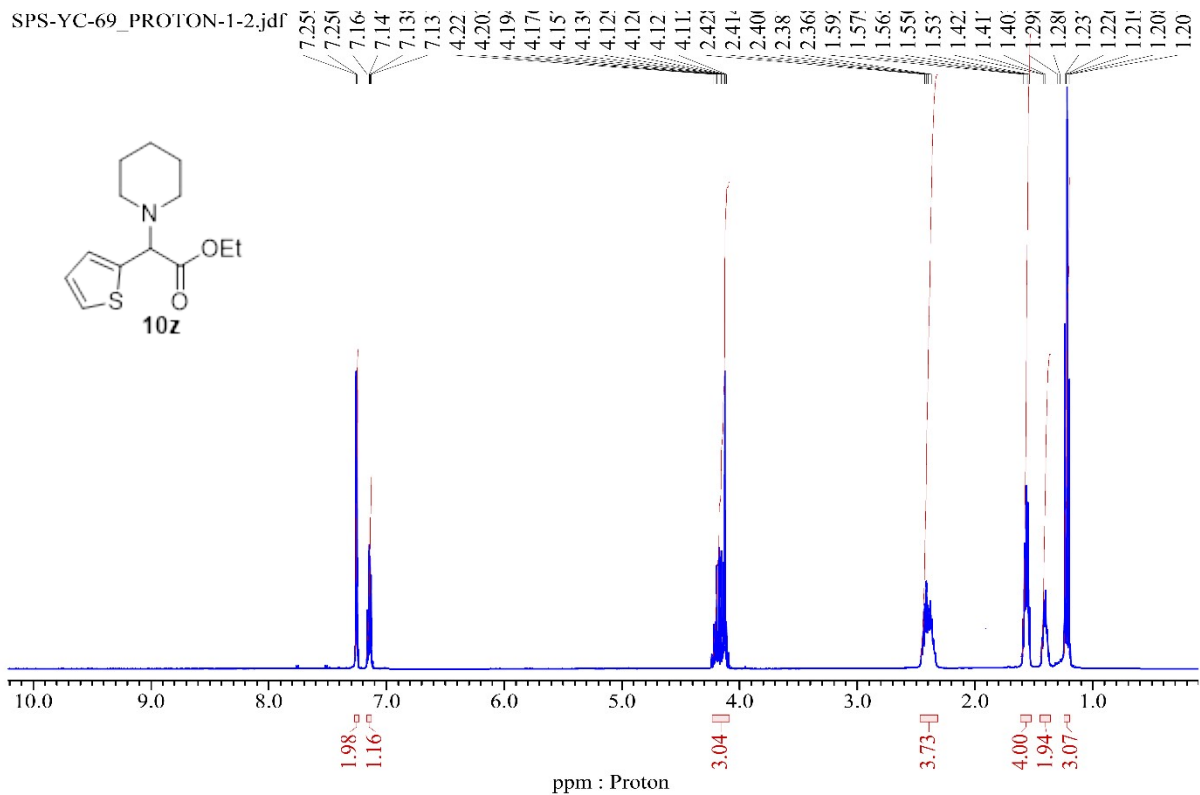

<sup>1</sup>H NMR spectrum of **10z**

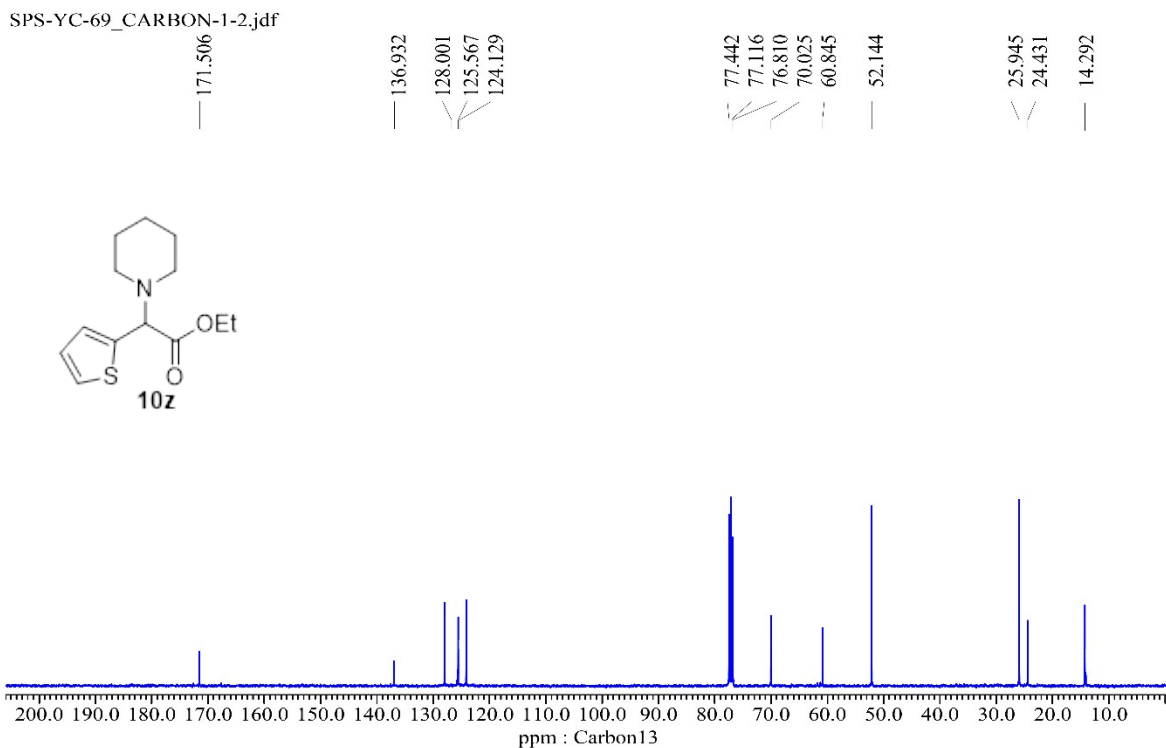

<sup>13</sup>C NMR spectrum of **10z**
